# Supplementary material for: Antigiardial activity of novel triazolyl-quinolone-based chalcone derivatives: when oxygen makes the difference
Source: PubMed Central journal article supplement (PMC4389562; doi:10.3389/fmicb.2015.00256), 2015-04-08
Supplement: data_sheet_1.pdf [file data_sheet_1.pdf]

## Supplementary Material

# Antigiardial activity of novel triazolyl quinolone-based chalcone derivatives: when oxygen makes the difference

Vijay Bahadur<sup>1,§</sup>, Daniela Mastronicola<sup>2,4,§</sup>, Amit Kumar Singh<sup>1</sup>, Hemandra Kumar Tiwari<sup>1</sup>, Leopoldo Paolo Pucillo<sup>3</sup>, Paolo Sarti<sup>2,4</sup>, Brajendra Kumar Singh<sup>1,\*</sup>, Alessandro Giuffrè<sup>2,\*</sup>

<sup>1</sup>Bio-Organic Laboratory, Department of Chemistry, Delhi University, Delhi, India

<sup>2</sup>CNR Institute of Molecular Biology and Pathology, Rome, Italy

<sup>3</sup>L. Spallanzani National Institute for Infectious Diseases, IRCCS, Rome, Italy

<sup>4</sup>Department of Biochemical Sciences and Istituto Pasteur – Fondazione Cenci Bolognetti, Sapienza University of Rome, Italy

<sup>§</sup>These Authors contributed equally to this work

### \* Correspondence:

- Alessandro Giuffrè, CNR Institute of Molecular Biology and Pathology, Piazzale Aldo Moro 5, I-00185 Rome, Italy, alessandro.giuffre@uniroma1.it

- Brajendra Kumar Singh, Department of Chemistry, University of Delhi, Delhi 110-007, India, singhbk@chemistry.du.ac.in

## 1. Supplementary Data

### Physico-chemical properties of the newly synthesized compounds:

#### 2-oxo-1-((1-phenyl-1H-1,2,3-triazol-4-yl)methyl)-1,2-dihydroquinoline-3-carbaldehyde (10)

**Yield:** 77%, light brown solid.

**Melting Point:** 180-182 °C.

**IR (KBr) (cm<sup>-1</sup>):**  $\nu$  3025 (sp<sup>3</sup> C-H), 1665 (C=O) 1599 (C=C).

**<sup>1</sup>H NMR (400 MHz, CDCl<sub>3</sub>):**  $\delta$  5.66 (2H, s, C-4aH), 7.27-7.31 (1H, m, Ar-H), 7.55-7.62 (5H, m, Ar-H), 7.71-7.75 (2H, m, Ar-H), 8.04 (2H, d,  $J$  = 8.54 Hz, Ar-H), 8.12 (1H, s, C-4H), 8.38 (1H, s, C-5'sH), 10.46(1H, s, CHO).

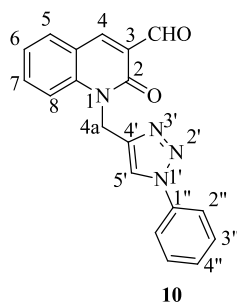

<sup>13</sup>C NMR (100 MHz, CDCl<sub>3</sub>): 38.18 (C-4a), 115.65, 119.44, 120.33, 121.86, 123.41, 125.00, 130.19, 131.83, 134.32, 134.49, 139.03, 141.38, 142.13, 143.45 (C-2), 161.70, 189.73 (CHO).

HRMS: *m/z* Calculated for C<sub>19</sub>H<sub>15</sub>N<sub>4</sub>O<sub>2</sub> [M+H]<sup>+</sup> 331.1190 found 331.1205.

### 1-((1-(4-fluorophenyl)-1H-1,2,3-triazol-4-yl)methyl)-2-oxo-1,2-dihydroquinoline-3-carbaldehyde (11)

Yield: 55%, light yellow solid.

Melting Point: 202-204 °C.

IR (KBr) (cm<sup>-1</sup>): ν 3022 (sp<sup>3</sup> C-H), 1685 (C=O), 1590 (C=C), 822 (*p*-substitution).

<sup>1</sup>H NMR (400 MHz, CDCl<sub>3</sub>): δ 5.88 (2H, s, C-4aH), 7.27-7.33 (1H, m, Ar-H), 7.45-7.49 (1H, m, Ar-H), 7.58-7.66 (3H, m, Ar-H), 7.73-7.80 (2H, m, Ar-H), 7.87-7.93 (2H, m, Ar-H), 8.14 (1H, s, C-4H), 8.63 (1H, s, C-5'H), 10.48 (1H, s, CHO).

<sup>13</sup>C NMR (100 MHz, CDCl<sub>3</sub>): δ 37.88 (C-4a), 121.82, 122.04, 125.40, 127.19, 129.85, 132.81, 132.92, 140.35, 144.33, 159.83 (C-2), 188.87 (CHO).

HRMS: *m/z* Calculated for C<sub>19</sub>H<sub>14</sub>FN<sub>4</sub>O<sub>2</sub> [M+H]<sup>+</sup> 349.1095 found 349.1095.

### 1-((1-(4-chlorophenyl)-1H-1,2,3-triazol-4-yl)methyl)-2-oxo-1,2-dihydroquinoline-3-carbaldehyde (12)

Yield: 60%, light brown solid.

Melting Point: 200-202 °C.

IR (KBr) (cm<sup>-1</sup>): ν 3011 (sp<sup>3</sup> C-H), 1675 (C=O), 1597 (C=C), 830 (*p*-substitution).

<sup>1</sup>H NMR (400 MHz, CDCl<sub>3</sub>): δ 5.68 (2H, s, C-4aH), 7.29-7.36 (1H, m, Ar-H), 7.44-7.50 (3H, m, Ar-H), 7.63-7.66 (2H, m, Ar-H), 7.73-7.77 (2H, m, Ar-H), 8.06 (1H, d, *J* = 8.56 Hz, Ar-H), 8.14 (1H, s, C-4H), 8.40 (1H, s, C-5'H), 10.49 (1H, s, -CHO).

<sup>13</sup>C NMR (100 MHz, CDCl<sub>3</sub>): δ 38.10 (C-

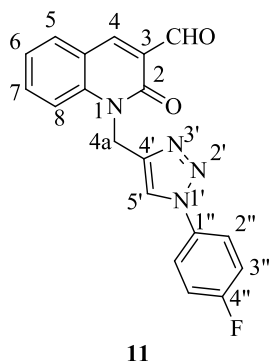

11

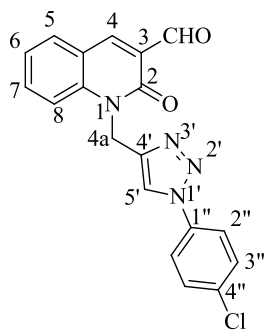

12

4a), 115.52, 119.46, 121.60, 121.88, 123.49, 125.00, 129.91, 131.89, 134.36, 134.72, 135.37, 141.46, 142.21, 161.70 (C-2a), 189.64 (CHO).

HRMS:  $m/z$  Calculated for C<sub>19</sub>H<sub>14</sub>ClN<sub>4</sub>O<sub>2</sub> [M+H]<sup>+</sup> 365.0800 found 365.0807.

### 2-oxo-1-((1-(*p*-tolyl)-1*H*-1,2,3-triazol-4-yl)methyl)-1,2-dihydroquinoline-3-carbaldehyde (13)

Yield: 65%, yellow solid.

Melting Point: 220-222 °C.

IR (KBr) (cm<sup>-1</sup>): ν 3020 (sp<sup>3</sup> C-H), 1680 (C=O), 1587 (C=C), 812 (*p*-substitution).

<sup>1</sup>H NMR (400 MHz, CDCl<sub>3</sub>): δ 2.36 (3H, s, CH<sub>3</sub>), 5.66 (2H, s, C-4aH), 7.24-7.30 (3H, m, Ar-H), 7.53 (2H, d, *J* = 8.54 Hz, Ar-H), 7.71 (2H, d, *J* = 7.93 Hz, Ar-H), 8.04-8.08 (2H, m, Ar-H), 8.37 (1H, s, C-5'H), 10.47 (1H, s, CHO).

<sup>13</sup>C NMR (100 MHz, CDCl<sub>3</sub>): δ 21.04 (CH<sub>3</sub>), 38.16 (C-4a), 115.64, 120.32, 121.87, 123.40, 124.99, 130.18, 131.81, 134.30, 134.48, 139.02, 141.36, 142.11, 161.68 (C-2a), 189.71 (CHO).

HRMS:  $m/z$  Calculated for C<sub>20</sub>H<sub>17</sub>N<sub>4</sub>O<sub>2</sub> [M+H]<sup>+</sup> 345.1346 found 345.1340.

### 1-((1-(4-methoxyphenyl)-1*H*-1,2,3-triazol-4-yl)methyl)-2-oxo-1,2-dihydroquinoline-3-carbaldehyde (14)

Yield: 70%, yellow solid.

Melting Point: 210-212 °C.

IR (KBr) (cm<sup>-1</sup>): ν 3005 (sp<sup>3</sup> C-H), 1669 (C=O), 1595 (C=C), 825 (*p*-substitution) 1090 (C-O-C).

<sup>1</sup>H NMR (400 MHz, CDCl<sub>3</sub>): δ 3.81 (3H, s, OCH<sub>3</sub>), 5.65 (2H, s, C-4aH), 6.96 (2H, d, *J* = 9.16 Hz, Ar-H), 7.28-7.30 (1H, m, Ar-H), 7.56 (2H, d, *J* = 9.16 Hz, Ar-H), 7.70-7.74 (2H, m, Ar-H), 8.00 (2H, d, *J* = 9.16 Hz, Ar-H), 8.37 (1H, s, C-5'H), 10.47 (1H, s, CHO).

<sup>13</sup>C NMR (100 MHz, CDCl<sub>3</sub>): δ 38.19 (C-

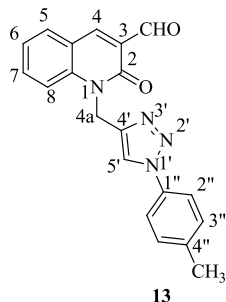

13

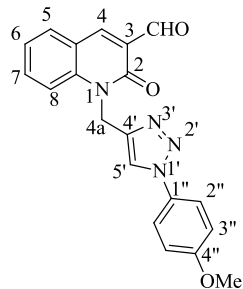

14

4a), 55.57 (OCH<sub>3</sub>), 114.70, 115.65, 119.44, 122.07, 123.41, 125.01, 131.82, 134.32, 141.39, 142.13, 159.86 (C-2), 189.73 (CHO).

HRMS: *m/z* Calculated for C<sub>20</sub>H<sub>17</sub>N<sub>4</sub>O<sub>3</sub> [M+H]<sup>+</sup> 361.1295 found 361.1302.

**(*E*)-3-(3-(2-fluorophenyl)-3-oxoprop-1-en-1-yl)-1-((1-(4-methoxyphenyl)-1*H*-1,2,3-triazol-4-yl)methyl)quinolin-2(1*H*)-one (23)**

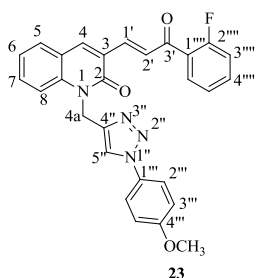

**Yield:** 68%, yellow solid.

**Melting Point:** 215-217 °C.

**IR** (KBr) (cm<sup>-1</sup>): ν 2957 (sp<sup>3</sup> C-H), 1727 (C=O), 1629 (C=C), 1082 (C-O-C), 820 (*p*-substitution).

**<sup>1</sup>H NMR** (400 MHz, CDCl<sub>3</sub>): δ 3.80 (3H, s, -OMe), 5.69 (2H, s, C-4aH), 6.92-6.94 (2H, m, Ar-H), 7.12-7.14 (2H, m, Ar-H), 7.25-7.27 (1H, m, Ar-H), 7.54-7.56 (3H, m, Ar-H), 7.60-7.65 (2H, m, Ar-H), 7.78 (1H, d, *J* = 15.57 Hz, C-2'H), 7.97-8.02 (3H, m, Ar-H), 8.09-8.13 (1H, m, Ar-H), 8.45 ((1H, d, *J* = 15.57 Hz, C-1'H).

**<sup>13</sup>C NMR** (100 MHz, CDCl<sub>3</sub>): δ 38.68 (C-4a), 55.55 (-OCH<sub>3</sub>), 111.68, 114.66, 115.28, 115.56, 120.31, 120.33, 121.86, 122.08, 123.02, 125.34, 125.68, 129.64, 130.26, 131.25, 131.34, 132.48, 139.12, 140.05, 142.68, 143.73, 159.80, 160.90 (C-2), 189.28 (C-3').

HRMS: *m/z* Calculated for C<sub>28</sub>H<sub>21</sub>N<sub>4</sub>O<sub>3</sub> [M]<sup>+</sup> 480.1598 found 480.1555.

**(E)-3-(3-(3-fluorophenyl)-3-oxoprop-1-en-1-yl)-1-((1-(4-methoxyphenyl)-1H-1,2,3-triazol-4-yl)methyl)quinolin-2(1H)-one (24)**

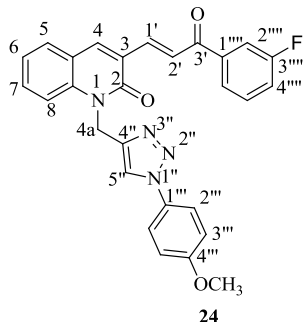

**Yield:** 70%, yellow solid

**Melting Point:** 210-212 °C.

**IR** (KBr) (cm<sup>-1</sup>): ν 2967 (sp<sup>3</sup> C-H), 1720 (C=O), 1625 (C=C), 1080 (C-O-C), 820 (*p*-substitution).

**<sup>1</sup>H NMR** (400 MHz, CDCl<sub>3</sub>): δ 3.75 (3H, s, -OMe), 5.64 (2H, s, C-4aH), 6.87-6.89 (2H, m, Ar-H), 7.19-7.23 (1H, m, Ar-H), 7.38-7.41 (2H, m, Ar-H), 7.50-7.61 (4H, m, Ar-H), 7.74 (1H, d, *J* = 15.11 Hz, C-2'H), 7.93-7.98 (5H, m, Ar-H), 8.39 ((1H, d, *J* = 15.11 Hz, C-1'H).

**<sup>13</sup>C NMR** (100 MHz, CDCl<sub>3</sub>): δ 38.68 (C-4a), 55.54 (-OCH<sub>3</sub>), 114.67, 115.38, 119.15, 122.02, 125.20, 129.56, 131.80, 134.47, 145.05, 160.55 (C-2), 189.86 (C-3').

**HRMS:** *m/z* Calculated for C<sub>28</sub>H<sub>21</sub>N<sub>4</sub>O<sub>3</sub> [M]<sup>+</sup> 480.1528 found 480.1565.

**(E)-3-(3-(4-fluorophenyl)-3-oxoprop-1-en-1-yl)-1-((1-(4-methoxyphenyl)-1H-1,2,3-triazol-4-yl)methyl)quinolin-2(1H)-one (25)**

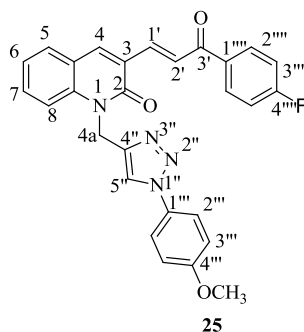

**Yield:** 72%, yellow solid.

**Melting Point:** 211-213 °C.

**IR** (KBr) (cm<sup>-1</sup>): ν 2887 (sp<sup>3</sup> C-H), 1721 (C=O), 1623 (C=C), 1080 (C-O-C), 822 (*p*-substitution).

**<sup>1</sup>H NMR** (400 MHz, CDCl<sub>3</sub>): δ 3.80 (3H, s, -OMe), 5.69 (2H, s, C-4aH), 6.92-6.94 (2H, m, Ar-H), 7.12-7.14 (2H, m, Ar-H), 7.25-7.27 (1H, m, Ar-H), 7.54-7.56 (3H, m, Ar-H), 7.60-7.65 (2H, m, Ar-H), 7.78 (1H, d, *J* = 15.57 Hz, C-2'H), 7.97-8.02 (3H, m,

Ar-H), 8.09-8.13 (1H, m, Ar-H), 8.45 ((1H, d,  $J = 15.57$  Hz, C-1'H).

<sup>13</sup>C NMR (100 MHz, CDCl<sub>3</sub>): δ 38.68 (C-4a), 55.55 (-OCH<sub>3</sub>), 111.68, 114.66, 115.28, 115.56, 120.31, 120.33, 121.86, 122.08, 123.02, 125.34, 125.68, 129.64, 130.26, 131.25, 131.34, 132.48, 139.12, 140.05, 142.68, 143.73, 159.80, 160.90 (C-2), 189.28 (C-3').

HRMS:  $m/z$  Calculated for C<sub>28</sub>H<sub>21</sub>N<sub>4</sub>O<sub>3</sub> [M]<sup>+</sup> 480.1528 found 480.1550.

**(E)-3-(3-(4-chlorophenyl)-3-oxoprop-1-en-1-yl)-1-((1-(4-methoxyphenyl)-1H-1,2,3-triazol-4-yl)methyl)quinolin-2(1H)-one (26)**

Yield: 70%, yellow solid.

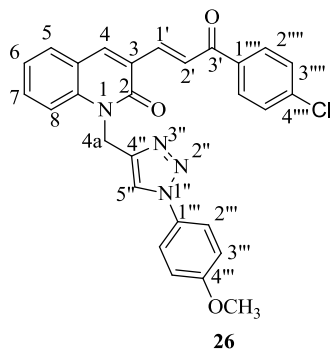

Melting Point: 230-232 °C.

IR (KBr) (cm<sup>-1</sup>): ν 2867 (sp<sup>3</sup> C-H), 1710 (C=O), 1625 (C=C), 1080 (C-O-C), 818 (*p*-substitution).

<sup>1</sup>H NMR (400 MHz, CDCl<sub>3</sub>): δ 3.75 (3H, s, -OMe), 5.64 (2H, s, C-4aH), 6.87-6.89 (2H, m, Ar-H), 7.19-7.23 (1H, m, Ar-H), 7.38-7.41 (2H, m, Ar-H), 7.50-7.61 (4H, m, Ar-H), 7.74 (1H, d,  $J = 15.11$  Hz, C-2'H), 7.93-7.98 (5H, m, Ar-H), 8.39 ((1H, d,  $J = 15.11$  Hz, C-1'H).

<sup>13</sup>C NMR (100 MHz, CDCl<sub>3</sub>): δ 38.68 (C-4a), 55.56 (-OCH<sub>3</sub>), 114.68, 115.30, 122.11, 123.06, 125.21, 128.89, 129.68, 130.10, 132.55, 140.32, 142.81, 159.82 (C-2), 190.27 (C-3').

HRMS:  $m/z$  Calculated for C<sub>28</sub>H<sub>21</sub>N<sub>4</sub>O<sub>3</sub> [M]<sup>+</sup> 496.1328 found 496.1375.

**(E)-3-(3-(4-bromophenyl)-3-oxoprop-1-en-1-yl)-1-((1-(4-methoxyphenyl)-1H-1,2,3-triazol-4-yl)methyl)quinolin-2(1H)-one (27)**

**Yield:** 75%, yellow solid.

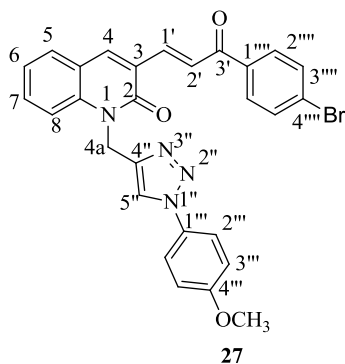

**Melting Point:** 201-203 °C.

**IR** (KBr) (cm<sup>-1</sup>): ν 2863 (sp<sup>3</sup> C-H), 1714 (C=O), 1628 (C=C), 1080 (C-O-C), 819 (*p*-substitution).

**<sup>1</sup>H NMR** (400 MHz, CDCl<sub>3</sub>): δ 3.80 (3H, s, -OMe), 5.69 (2H, s, C-4aH), 6.93-6.95 (2H, m, Ar-H), 7.24-7.28 (2H, m, Ar-H), 7.55-7.72 (6H, m, Ar-H), 7.93 (1H, d, *J* = 15.11 Hz, C-2'H), 7.94-8.02 (4H, m, Ar-H), 8.43 ((1H, d, *J* = 15.11 Hz, C-1'H).

**<sup>13</sup>C NMR** (100 MHz, CDCl<sub>3</sub>): δ 38.68 (C-4a), 55.55 (-OCH<sub>3</sub>), 114.68, 115.58, 122.11, 125.40, 129.69, 130.23, 131.88, 136.93, 139.17, 140.54, 142.61, 159.62 (C-2), 190.09 (C-3').

**HRMS:** *m/z* Calculated for C<sub>28</sub>H<sub>21</sub>N<sub>4</sub>O<sub>3</sub> [M]<sup>+</sup> 540.0797 found 540.0755.

**(E)-1-((1-(4-methoxyphenyl)-1H-1,2,3-triazol-4-yl)methyl)-3-(3-oxo-3-(*p*-tolyl)prop-1-en-1-yl)quinolin-2(1H)-one (28)**

**Yield:** 62%, yellow solid.

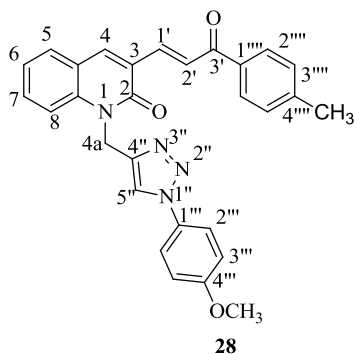

**Melting Point:** 213-215 °C.

**IR** (KBr) (cm<sup>-1</sup>): ν 2950 (sp<sup>3</sup> C-H), 1720 (C=O), 1729 (C=C), 1080 (C-O-C), 820 (*p*-substitution).

**<sup>1</sup>H NMR** (400 MHz, CDCl<sub>3</sub>): δ 21.68 (3H, s, -CH<sub>3</sub>), 3.81 (3H, s, -OMe), 5.70 (2H, s, C-4aH), 6.93-6.95 (2H, m, Ar-H), 7.24-7.29 (2H, m, Ar-H), 7.54-7.65 (5H, m, Ar-H), 7.79 (1H, d, *J* = 15.57 Hz, C-2'H), 7.97-8.03 (5H, m, Ar-H), 8.45 (1H, m, Ar-H).

**<sup>13</sup>C NMR** (100 MHz, CDCl<sub>3</sub>): δ 38.61 (C-4a), 55.51 (-OCH<sub>3</sub>), 55.78 (-OCH<sub>3</sub>),

111.68, 114.60, 115.15, 120.31, 120.61, 121.85, 122.00, 122.84, 126.34, 129.20, 129.49, 130.23, 132.07, 132.81, 138.05, 139.14, 140.29, 143.80, 158.14, 159.70, 160.85 (C-2), 193.39 (C-3').

HRMS:  $m/z$  Calculated for C<sub>29</sub>H<sub>24</sub>N<sub>4</sub>O<sub>3</sub> [M]<sup>+</sup> 476.1828 found 476.1855.

**(E)-1-((1-(4-methoxyphenyl)-1H-1,2,3-triazol-4-yl)methyl)-3-(3-(2-methoxyphenyl)-3-oxoprop-1-en-1-yl)quinolin-2(1H)-one (29)**

**Yield:** 65%, yellow solid.

**Melting Point:** 210-212 °C.

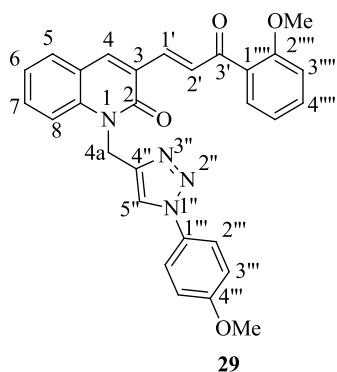

**IR** (KBr) (cm<sup>-1</sup>):  $\nu$  2955 (sp<sup>3</sup> C-H), 1725 (C=O), 1629 (C=C), 1080 (C-O-C), 822 (*p*-substitution).

**<sup>1</sup>H NMR** (400 MHz, CDCl<sub>3</sub>):  $\delta$  3.80 (3H, s, -OMe), 3.81 (3H, s, -OMe), 5.66 (2H, s, C-4aH), 6.93 (2H, d,  $J$  = 8.70 Hz, Ar-H), 7.03-7.05 (1H, m, Ar-H), 7.25-7.27 (2H, m, Ar-H), 7.44-7.45 (1H, m, Ar-H), 7.54 (2H, d,  $J$  = 8.70 Hz, Ar-H), 7.60-7.63 (3H, m, Ar-H), 7.72 (1H, d,  $J$  = 15.16 Hz, C-2'H), 7.77-7.79 (1H, m, Ar-H), 7.99 (2H, d,  $J$  = 7.79, Ar-H).

**<sup>13</sup>C NMR** (100 MHz, CDCl<sub>3</sub>):  $\delta$  38.61 (C-4a), 55.51 (-OCH<sub>3</sub>), 55.78 (-OCH<sub>3</sub>), 111.68, 114.60, 115.15, 120.31, 120.61, 121.85, 122.00, 122.84, 126.34, 129.20, 129.49, 130.23, 132.07, 132.81, 138.05, 139.14, 140.29, 143.80, 158.14, 159.70, 160.85 (C-2), 193.39 (C-3').

HRMS:  $m/z$  Calculated for C<sub>29</sub>H<sub>24</sub>N<sub>4</sub>O<sub>4</sub> [M]<sup>+</sup> 492.1828 found 492.1855.



**(E)-1-((1-(4-methoxyphenyl)-1H-1,2,3-triazol-4-yl)methyl)-3-(3-(3-methoxyphenyl)-3-oxoprop-1-en-1-yl)quinolin-2(1H)-one (30)**

**Yield:** 55%, light yellow solid.

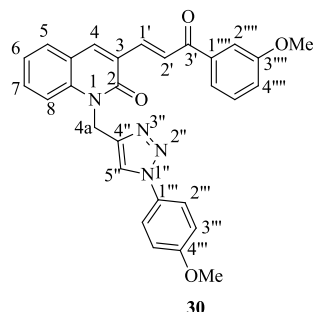

**Melting Point:** 196-198 °C.

**IR** (KBr) (cm<sup>-1</sup>): ν 2989 (sp<sup>3</sup> C-H), 1695 (C=O), 1590 (C=C), 1100 (C-O-C), 822 (*p*-substitution).

**<sup>1</sup>H NMR** (400 MHz, CDCl<sub>3</sub>): δ 3.79 (3H, s, -OMe), 3.85 (3H, s, -OMe), 5.69 (2H, s, C-4aH), 6.92 (2H, d, *J* = 9.16 Hz, Ar-H), 7.11-7.12 (1H, m, Ar-H), 7.24-7.25 (1H, m, Ar-H), 7.40-7.42 (2H, m, Ar-H), 7.54-7.63 (4H, m, Ar-H), 7.80 (1H, d, *J* = 15.57 Hz, C-2'H), 7.95-7.98 (2H, m, Ar-H), 8.01 (1H, s, C-5''H), 8.39 (1H, d, *J* = 15.57 Hz, C-1'H).

**<sup>13</sup>C NMR** (100 MHz, CDCl<sub>3</sub>): δ 38.68 (C-4a), 55.46 (-OCH<sub>3</sub>), 55.54 (-OCH<sub>3</sub>), 112.76, 114.62, 115.22, 119.42, 120.31, 121.39, 121.80, 122.05, 122.94, 125.74, 125.84, 129.50, 129.59, 130.26, 132.33, 139.11, 139.41, 139.78, 142.15, 159.76, 159.81, 160.86 (C-2), 163.49, 189.20 (C-3').

**HRMS:** *m/z* Calculated for C<sub>29</sub>H<sub>24</sub>N<sub>4</sub>O<sub>4</sub> [M]<sup>+</sup> 492.1828 found 492.1790.

**(E)-1-((1-(4-methoxyphenyl)-1H-1,2,3-triazol-4-yl)methyl)-3-(3-(4-methoxyphenyl)-3-oxoprop-1-en-1-yl)quinolin-2(1H)-one (31)**

**Yield:** 65%, light yellow solid.

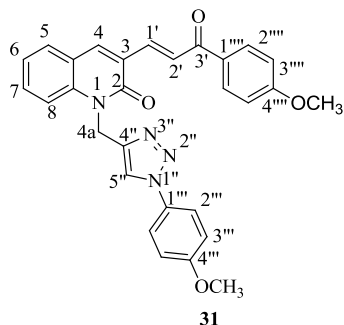

**Melting Point:** 190-192 °C.

**IR** (KBr) (cm<sup>-1</sup>): ν 2982 (sp<sup>3</sup> C-H), 1705 (C=O), 1593 (C=C), 1103 (C-O-C), 820 (*p*-substitution).

**<sup>1</sup>H NMR** (400 MHz, CDCl<sub>3</sub>): δ 3.79 (3H, s, -OMe), 3.85 (3H, s, -OMe), 5.69 (2H, s, C-4aH), 6.91-6.95 (4H, m, Ar-H), 7.24-7.25 (1H, m, Ar-H), 7.54-7.63 (4H, m,

Ar-H), 7.76 (1H, d,  $J = 15.57$  Hz, C-2'H), 7.95-8.09 (5H, m, Ar-H), 8.45 (1H, d,  $J = 15.57$  Hz, C-1'H).

<sup>13</sup>C NMR (100 MHz, CDCl<sub>3</sub>):  $\delta$  38.68 (C-4a), 55.46 (-OCH<sub>3</sub>), 55.54 (-OCH<sub>3</sub>), 113.76, 114.64, 115.21, 120.39, 121.86, 122.08, 122.94, 125.76, 125.98, 129.55, 130.27, 131.03, 132.24, 139.03, 142.14, 143.81, 159.77, 163.45 (C-2), 189.20 (C-3').

HRMS:  $m/z$  Calculated for C<sub>29</sub>H<sub>24</sub>N<sub>4</sub>O<sub>4</sub> [M]<sup>+</sup> 492.1728 found 492.1790.

**(E)-3-(3-(2-fluorophenyl)-3-oxoprop-1-en-1-yl)-1-((1-(*p*-tolyl)-1H-1,2,3-triazol-4-yl)methyl)quinolin-2(1H)-one (32)**

**Yield:** 88%, yellow solid.

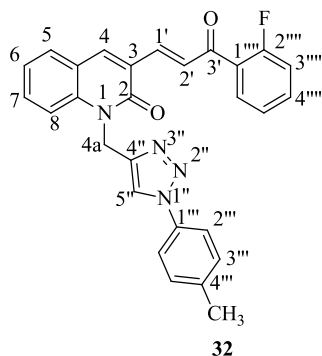

**Melting Point:** 197-199 °C.

**IR** (KBr) (cm<sup>-1</sup>):  $\nu$  2955 (sp<sup>3</sup> C-H), 1705 (C=O), 1590 (C=C), 1080 (C-F), 822 (*p*-substitution).

<sup>1</sup>H NMR (400 MHz, CDCl<sub>3</sub>):  $\delta$  2.35 (3H, s, -CH<sub>3</sub>), 5.67 (2H, s, C-4aH), 7.17-7.20, (1H, m, Ar-H), 7.22-7.25 (4H, m, Ar-H), 7.52-7.54 (3H, m, Ar-H), 7.60-7.62 (2H, m, Ar-H), 7.78-7.82 (2H, m, Ar-H), 8.00-8.03 (2H, m, Ar-H), 8.07-8.12 (2H, m, Ar-H).

<sup>13</sup>C NMR (100 MHz, CDCl<sub>3</sub>):  $\delta$  21.01 (-CH<sub>3</sub>), 38.62 (C-4a), 115.25, 116.66, 120.30, 122.93, 124.41, 125.83, 129.64, 130.10, 130.86, 139.60, 141.44, 160.94 (C-2), 189.67 (C-3').

HRMS:  $m/z$  Calculated for C<sub>28</sub>H<sub>21</sub>FN<sub>4</sub>O<sub>2</sub> [M]<sup>+</sup> 464.1624 found 464.1615.

**(E)-3-(3-(3-fluorophenyl)-3-oxoprop-1-en-1-yl)-1-((1-(p-tolyl)-1H-1,2,3-triazol-4-yl)methyl)quinolin-2(1H)-one (33)**

**Yield:** 78%, yellow solid.

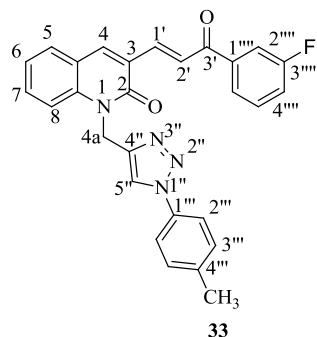

**Melting Point:** 210-212 °C.

**IR** (KBr) (cm<sup>-1</sup>): ν 2950 (sp<sup>3</sup> C-H), 1700 (C=O), 1580 (C=C), 1080 (C-F), 822 (*p*-substitution).

**<sup>1</sup>H NMR** (400 MHz, CDCl<sub>3</sub>): δ 2.34 (3H, s, -CH<sub>3</sub>), 5.69 (2H, s, C-4aH), 7.21-7.28, (4H, m, Ar-H), 7.42-7.54 (3H, m, Ar-H), 7.60-7.65 (2H, m, Ar-H), 7.68-7.87 (3H, m, Ar-H), 7.97-8.08 (3H, m, Ar-H), 8.41 (1H, d, *J* = 15.11 Hz, Ar-H).

**<sup>13</sup>C NMR** (100 MHz, CDCl<sub>3</sub>): δ 21.02 (-CH<sub>3</sub>), 38.65 (C-4a), 115.27, 119.72, 119.93, 120.33, 123.10, 124.37, 125.18, 125.58, 129.67, 130.13, 132.53, 138.92, 140.51, 142.80, 161.31 (C-2), 190.05 (C-3').

**HRMS:** *m/z* Calculated for C<sub>28</sub>H<sub>21</sub>FN<sub>4</sub>O<sub>2</sub> [M]<sup>+</sup> 464.1624 found 464.1615.

**(E)-3-(3-(4-fluorophenyl)-3-oxoprop-1-en-1-yl)-1-((1-(p-tolyl)-1H-1,2,3-triazol-4-yl)methyl)quinolin-2(1H)-one (34)**

**Yield:** 70%, yellow solid.

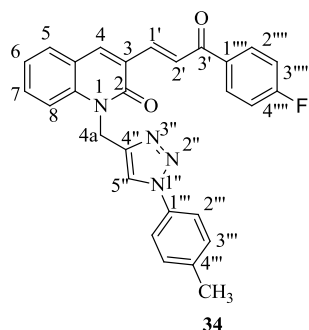

**Melting Point:** 215-217 °C.

**IR** (KBr) (cm<sup>-1</sup>): ν 2940 (sp<sup>3</sup> C-H), 1710 (C=O), 1600 (C=C), 1070 (C-F), 820 (*p*-substitution).

**<sup>1</sup>H NMR** (400 MHz, CDCl<sub>3</sub>): δ 2.34 (3H, s, -CH<sub>3</sub>), 5.69 (2H, s, C-4aH), 7.11-7.26, (5H, m, Ar-H), 7.52-7.54 (2H, m, Ar-H), 7.59-7.64 (2H, m, Ar-H), 7.77 (1H, d, *J* = 15.11 Hz, C-2'H), 7.96-7.98 (2H, m, Ar-H), 8.08-8.12 (3H, m, Ar-H), 8.45 (1H, d, *J* = 15.11 Hz, C-1'H).

**<sup>13</sup>C NMR** (100 MHz, CDCl<sub>3</sub>): δ 21.02 (-CH<sub>3</sub>), 38.65 (C-4a), 115.24, 115.53, 115.75,

120.32, 122.99, 125.30, 125.65, 129.63, 130.12, 131.22, 131.31, 132.44, 138.92, 139.08, 140.01, 142.66, 162.81 (C-2), 190.04 (C-3').

HRMS:  $m/z$  Calculated for C<sub>28</sub>H<sub>21</sub>N<sub>4</sub>O<sub>2</sub> [M]<sup>+</sup> 464.1636 found 464.1615.

**(E)-3-(3-(4-chlorophenyl)-3-oxoprop-1-en-1-yl)-1-((1-(p-tolyl)-1H-1,2,3-triazol-4-yl)methyl)quinolin-2(1H)-one (35)**

**Yield:** 80%, yellow solid.

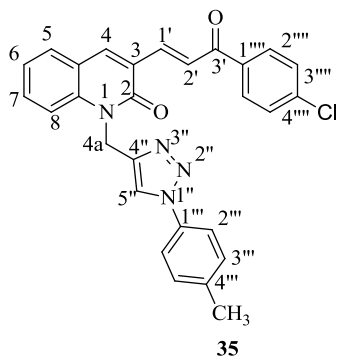

**Melting Point:** 196-198 °C.

**IR** (KBr) (cm<sup>-1</sup>): ν 2950 (sp<sup>3</sup> C-H), 1720 (C=O), 1605 (C=C), 1080 (C-F), 822 (*p*-substitution).

**<sup>1</sup>H NMR** (400 MHz, CDCl<sub>3</sub>): δ 2.35 (3H, s, -CH<sub>3</sub>), 5.69 (2H, s, C-4aH), 7.24-7.27, (4H, m, Ar-H), 7.38-7.54 (4H, m, Ar-H), 7.61-7.72 (2H, m, Ar-H), 7.79 (1H, d, *J* = 15.11 Hz, C-2'H), 8.00-8.03 (3H, m, Ar-H), 8.44 (1H, d, *J* = 15.11 Hz, C-1'H).

**<sup>13</sup>C NMR** (100 MHz, CDCl<sub>3</sub>): δ 21.07 (-CH<sub>3</sub>), 38.80 (C-4a), 115.30, 120.39, 123.07, 125.22, 128.89, 129.69, 130.11, 131.18, 132.56, 140.35, 142.86, 161.51 (C-2), 189.49 (C-3').

HRMS:  $m/z$  Calculated for C<sub>28</sub>H<sub>21</sub>ClN<sub>4</sub>O<sub>2</sub> [M]<sup>+</sup> 480.1353 found 480.1315.

**(E)-3-(3-(4-bromophenyl)-3-oxoprop-1-en-1-yl)-1-((1-(p-tolyl)-1H-1,2,3-triazol-4-yl)methyl)quinolin-2(1H)-one (36)**

**Yield:** 85%, yellow solid.

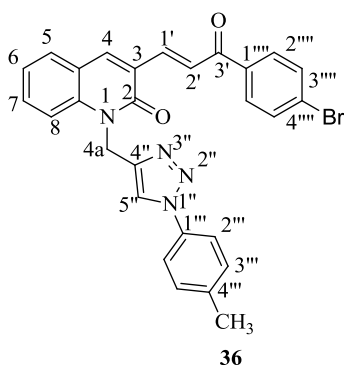

**Melting Point:** 216-218 °C.

**IR** (KBr) (cm<sup>-1</sup>): ν 2850 (sp<sup>3</sup> C-H), 1740 (C=O), 1615 (C=C), 1070 (C-F).

**<sup>1</sup>H NMR** (400 MHz, CDCl<sub>3</sub>): δ 2.40 (3H, s, -CH<sub>3</sub>), 5.69 (2H, s, C-4aH), 7.21-7.27, (6H, m, Ar-H), 7.52-7.54 (3H, m, Ar-H), 7.59-7.63 (2H, m, Ar-H), 7.78 (1H, d, *J* =

15.57 Hz, C-2'H), 7.95-8.00 (2H, m, Ar-H), 8.08 (1H, s, C-5''), 8.44 (1H, d,  $J = 15.57$  Hz, C-1'H).

<sup>13</sup>C NMR (100 MHz, CDCl<sub>3</sub>):  $\delta$  21.01 (-CH<sub>3</sub>), 38.63 (C-4a), 115.17, 120.29, 122.92, 125.75, 125.88, 128.80, 129.24, 129.56, 130.10, 131.18, 132.26, 138.86, 139.36, 142.17, 143.69, 160.72 (C-2), 190.36 (C-3').

HRMS:  $m/z$  Calculated for C<sub>28</sub>H<sub>21</sub>BrN<sub>4</sub>O<sub>2</sub> [M]<sup>+</sup> 524.0848 found 524.0890.

**(E)-3-(3-oxo-3-(*p*-tolyl)prop-1-en-1-yl)-1-((1-(*p*-tolyl)-1*H*-1,2,3-triazol-4-yl)methyl)quinolin-2(1*H*)-one (37)**

**Yield:** 92%, yellow solid.

**Melting Point:** 202-204 °C.

**IR** (KBr) (cm<sup>-1</sup>):  $\nu$  3020 (sp<sup>3</sup> C-H), 1685 (C=O), 1609 (C=C), 832 (*p*-substitution).

<sup>1</sup>H NMR (400 MHz, CDCl<sub>3</sub>):  $\delta$  2.14 (3H, s, -CH<sub>3</sub>), 2.35 (3H, s, -CH<sub>3</sub>), 5.69 (2H, s, C-4aH), 7.52-7.62 (8H, m, Ar-H), 7.79 (1H, d,  $J = 15.11$  Hz, C-2'H), 7.95-8.00 (4H, m, Ar-H), 8.07 (1H, s, C-5''H), 8.43 (1H, d,  $J = 15.57$  Hz, C-1'H).

<sup>13</sup>C NMR (100 MHz, CDCl<sub>3</sub>):  $\delta$  21.06 (-CH<sub>3</sub>), 38.69 (C-4a), 115.17, 120.29, 122.92, 125.75, 125.88, 128.80, 129.24, 129.56, 130.10, 132.26, 138.86, 139.38, 142.17, 143.69, 160.96 (C-2), 189.84 (C-3').

HRMS:  $m/z$  Calculated for C<sub>29</sub>H<sub>24</sub>N<sub>4</sub>O<sub>2</sub> [M]<sup>+</sup> 460.1976 found 460.1951.

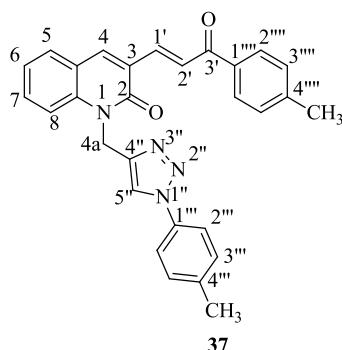

**(E)-3-(3-(2-methoxyphenyl)-3-oxoprop-1-en-1-yl)-1-((1-(*p*-tolyl)-1*H*-1,2,3-triazol-4-yl)methyl)quinolin-2(1*H*)-one (38)**

**Yield:** 90%, yellow solid.

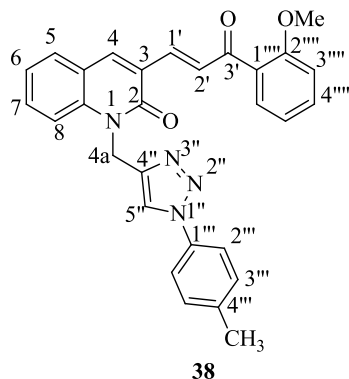

**Melting Point:** 153-155 °C.

**IR** (KBr) (cm<sup>-1</sup>): ν 3035, (sp<sup>3</sup> C-H), 1665 (C=O), 1620 (C=C), 1090 (C-O-C), 822 (*p*-substitution).

**<sup>1</sup>H NMR** (400 MHz, CDCl<sub>3</sub>): δ 2.36 (3H, s, -CH<sub>3</sub>), 3.89 (3H, s, -OCH<sub>3</sub>), 5.66 (2H, s, C-4aH), 6.98-7.03 (2H, m, Ar-H), 7.21-7.25 (4H, m, Ar-H), 7.45-7.47 (1H, m, Ar-H), 7.51-7.53 (2H, m, Ar-H), 7.60-7.62 (3H, m, Ar-H), 7.72 (1H, d, *J* = 15.57 Hz, C-2'H), 7.94-7.98 (3H, m, Ar-H), 8.04 (1H, s, C-5''H).

**<sup>13</sup>C NMR** (100 MHz, CDCl<sub>3</sub>): δ 21.02 (-CH<sub>3</sub>), 38.61 (C-4a), 55.78 (-OCH<sub>3</sub>), 111.63, 115.15, 120.28, 120.61, 122.87, 129.50, 130.11, 130.25, 132.09, 132.83, 138.08, 139.13, 140.33, 158.63, 161.45 (C-2), 193.80 (C-3').

**HRMS:** *m/z* Calculated for C<sub>29</sub>H<sub>24</sub>N<sub>4</sub>O<sub>3</sub> [M]<sup>+</sup> 476.1854 found 476.1833.

**(E)-3-(3-(3-methoxyphenyl)-3-oxoprop-1-en-1-yl)-1-((1-(*p*-tolyl)-1*H*-1,2,3-triazol-4-yl)methyl)quinolin-2(1*H*)-one (39)**

**Yield:** 91%, yellow solid.

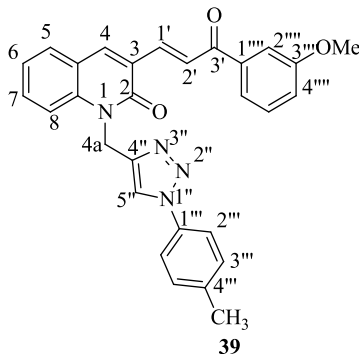

**Melting Point:** 192-194 °C.

**IR** (KBr) (cm<sup>-1</sup>): ν 2956 (sp<sup>3</sup> C-H), 1695 (C=O), 1588 (C=C), 1099 (C-O-C), 822 (*p*-substitution).

**<sup>1</sup>H NMR** (400 MHz, CDCl<sub>3</sub>): δ 2.34 (3H, s, -CH<sub>3</sub>), 3.85 (3H, s, -OCH<sub>3</sub>), 5.69 (2H, s, C-4aH), 7.11-7.15 (1H, m, Ar-H), 7.25-7.27 (1H, m, Ar-H), 7.53-7.61 (5H, m, Ar-H), 7.68 (1H, d, *J* = 7.33 Hz, Ar-H), 7.80 (1H, d, *J* = 15.57 Hz, C-2'H), 7.82-7.99 (2H, m, Ar-H), 8.09 (1H, s, C-5''H), 8.41 (1H, d, *J* = 15.57 Hz, C-1'H).

<sup>13</sup>C NMR (100 MHz, CDCl<sub>3</sub>): δ 21.02 (-CH<sub>3</sub>), 38.21 (C-4a), 55.42 (-OCH<sub>3</sub>), 112.70, 115.19, 119.43, 120.29, 121.38, 122.93, 125.70, 129.49, 129.59, 130.11, 132.33, 138.87, 139.79, 142.20, 159.78 (C-2), 160.69, 189.82 (C-3').

HRMS: *m/z* Calculated for C<sub>29</sub>H<sub>24</sub>N<sub>4</sub>O<sub>3</sub> [M]<sup>+</sup> 476.1854 found 476.1866.

**(*E*)-3-(3-(4-methoxyphenyl)-3-oxoprop-1-en-1-yl)-1-((1-(*p*-tolyl)-1*H*-1,2,3-triazol-4-yl)methyl)quinolin-2(1*H*)-one (40)**

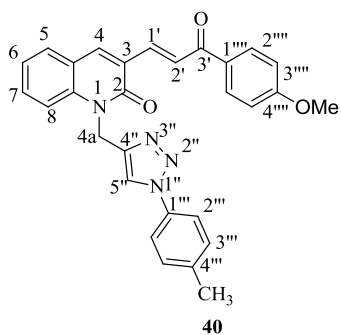

**Yield:** 67%, yellow solid.

**Melting Point:** 182-184 °C.

**IR** (KBr) (cm<sup>-1</sup>): ν 2946 (sp<sup>3</sup> C-H), 1675 (C=O), 1580 (C=C), 1090 (C-O-C), 820 (*p*-substitution).

<sup>1</sup>H NMR (400 MHz, CDCl<sub>3</sub>): δ 2.34 (3H, s, -CH<sub>3</sub>), 3.85 (3H, s, -OCH<sub>3</sub>), 5.69 (2H, s, C-4aH), 6.93-6.95 (2H, m, Ar-H), 7.21-7.25 (3H, m, Ar-H), 7.52-7.54 (4H, m, Ar-H), 7.76 (1H, d, *J* = 15.57 Hz, C-2'H), 7.95-7.97 (2H, m, Ar-H), 8.07-8.10 (1H, m, Ar-H), 8.47 (1H, d, *J* = 15.11 Hz, C-1'H).

<sup>13</sup>C NMR (100 MHz, CDCl<sub>3</sub>): δ 21.03 (-CH<sub>3</sub>), 38.67 (C-4a), 55.45 (-OCH<sub>3</sub>), 113.74, 115.17, 120.34, 122.92, 125.72, 125.95, 129.55, 130.13, 132.22, 138.89, 139.02, 142.16, 160.93 (C-2), 163.43, 189.15 (C-3').

HRMS: *m/z* Calculated for C<sub>29</sub>H<sub>24</sub>N<sub>4</sub>O<sub>3</sub> [M]<sup>+</sup> 476.1854 found 476.1866.

**(E)-1-((1-(4-fluorophenyl)-1H-1,2,3-triazol-4-yl)methyl)-3-(3-(2-fluorophenyl)-3-oxoprop-1-en-1-yl)quinolin-2(1H)-one (41)**

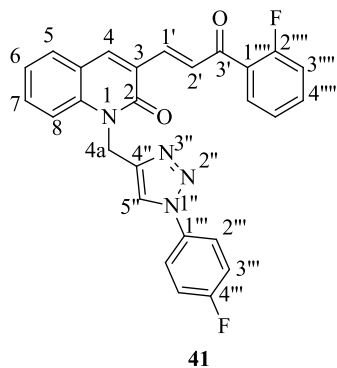

**Yield:** 82%, yellow solid.

**Melting Point:** 186-188 °C.

**IR** (KBr) (cm<sup>-1</sup>): ν 2955 (sp<sup>3</sup> C-H), 1675 (C=O), 1592 (C=C), 1028 (C-F), 818 (*p*-substitution).

**<sup>1</sup>H NMR** (400 MHz, CDCl<sub>3</sub>): δ 5.68 (2H, s, C-4aH), 7.12-7.18 (3H, m, Ar-H), 7.21-7.28 (3H, m, Ar-H), 7.50-7.52 (1H, m, Ar-H), 7.57-7.66 (4H, m, Ar-H), 7.79-7.83 (2H, m, Ar-H), 7.97 (1H, d, *J* = 8.7 Hz, Ar-H), 8.02 (1H, s, C-5''H), 8.06-8.08 (2H, m, Ar-H).

**<sup>13</sup>C NMR** (100 MHz, CDCl<sub>3</sub>): δ 38.54 (C-4a), 115.13, 117.13, 123.03, 125.56, 129.71, 129.82, 130.91, 132.44, 139.51, 141.52, 160.92 (C-2), 186.64 (C-3').

**HRMS:** *m/z* Calculated for C<sub>27</sub>H<sub>18</sub>F<sub>2</sub>N<sub>4</sub>O<sub>2</sub> [M]<sup>+</sup> 468.1434 found 468.1435.

**(E)-1-((1-(4-fluorophenyl)-1H-1,2,3-triazol-4-yl)methyl)-3-(3-(3-fluorophenyl)-3-oxoprop-1-en-1-yl)quinolin-2(1H)-one (42)**

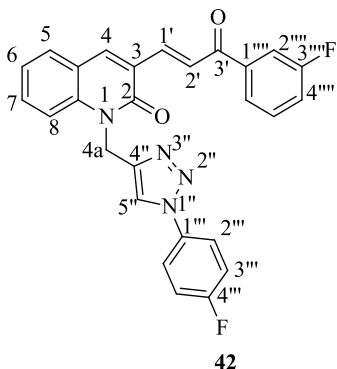

**Yield:** 68%, yellow solid.

**Melting Point:** 203-205 °C.

**IR** (KBr) (cm<sup>-1</sup>): ν 3030 (sp<sup>3</sup> C-H), 1665 (C=O), 1590 (C=C), 1020 (C-F), 820 (*p*-substitution).

**<sup>1</sup>H NMR** (400 MHz, CDCl<sub>3</sub>): δ 5.68 (2H, s, C-4aH), 7.11-7.15 (3H, m, Ar-H), 7.25-7.27 (3H, m, Ar-H), 7.47-7.49 (1H, m, Ar-H), 7.63-7.65 (2H, m, Ar-H), 7.71-7.74 (2H, m, Ar-H), 7.79 (1H, d, *J* = 15.11 Hz, C-2'H), 7.84-7.86 (1H, m, Ar-H), 7.95-7.99 (3H, m, Ar-H), 8.09 (1H, s, C-5''H), 8.39 (1H, d, *J* = 15.57 Hz, C-1'H).

**<sup>13</sup>C NMR** (100 MHz, CDCl<sub>3</sub>): δ 38.57 (C-4a), 115.17, 116.52, 116.74, 119.97,



120.28, 121.99, 122.39, 122.47, 123.07, 124.35, 125.55, 129.72, 130.17, 130.25, 132.56, 139.09, 140.08, 140.14, 140.46, 142.82, 144.04, 160.84, 161.13, 161.59, 163.61 (C-2), 189.51 (C-3').

HRMS:  $m/z$  Calculated for C<sub>27</sub>H<sub>18</sub>F<sub>2</sub>N<sub>4</sub>O<sub>2</sub> [M]<sup>+</sup> 468.1434 found 468.1431.

**(E)-1-((1-(4-fluorophenyl)-1H-1,2,3-triazol-4-yl)methyl)-3-(3-(4-fluorophenyl)-3-oxoprop-1-en-1-yl)quinolin-2(1H)-one (43)**

**Yield:** 87%, yellow solid.

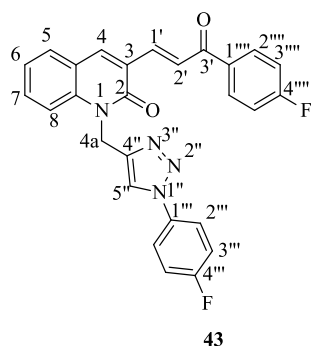

**Melting Point:** 202-204 °C.

**IR** (KBr) (cm<sup>-1</sup>): ν 2990 (sp<sup>3</sup> C-H), 1665 (C=O), 1610 (C=C), 1080 (C-F), 810 (*p*-substitution).

**<sup>1</sup>H NMR** (400 MHz, CDCl<sub>3</sub>): δ 5.70 (2H, s, C-4aH), 7.21-7.25 (3H, m, Ar-H), 7.38-7.44 (4H, m, Ar-H), 7.64-7.67 (3H, m, Ar-H), 7.84-7.87 (3H, m, Ar-H), 7.88-8.00 (2H, m, Ar-H), 8.11 (1H, s, C-5''H), 8.42 (1H, d, *J* = 15.11 Hz, C-1'H).

**<sup>13</sup>C NMR** (100 MHz, CDCl<sub>3</sub>): δ 37.95 (C-4a), 115.22, 120.47, 123.04, 125.15, 128.81, 129.65, 132.56, 139.08, 140.49, 142.87, 161.43, 164.02 (C-2), 189.42 (C-3').

HRMS:  $m/z$  Calculated for C<sub>27</sub>H<sub>18</sub>F<sub>2</sub>N<sub>4</sub>O<sub>2</sub> [M]<sup>+</sup> 468.1434 found 468.1421.

**(E)-3-(3-(4-chlorophenyl)-3-oxoprop-1-en-1-yl)-1-((1-(4-fluorophenyl)-1H-1,2,3-triazol-4-yl)methyl)quinolin-2(1H)-one (44)**

**Yield:** 88%, yellow solid.

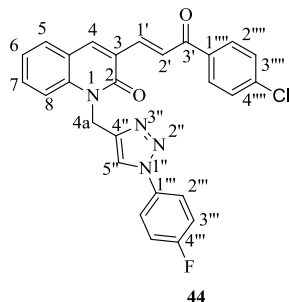

**Melting Point:** 190-192 °C.

**IR** (KBr) (cm<sup>-1</sup>): ν 2890 (sp<sup>3</sup> C-H), 1660 (C=O), 1620 (C=C), 1080 (C-F), 820 (*p*-substitution).

**<sup>1</sup>H NMR** (400 MHz, CDCl<sub>3</sub>): δ 5.69 (2H, s, C-4aH), 7.12-7.16 (3H, m, Ar-H), 7.24-7.30 (2H, m, Ar-H), 7.41-7.47 (2H, m, Ar-H), 7.61-7.66 (3H, m, Ar-H), 7.75-7.80 (1H, m, Ar-H), 7.96-8.02 (3H, m, Ar-H), 8.08 (1H, s, C-5''H), 8.43 (1H, d, *J* = 15.11 Hz, C-1'H).

**<sup>13</sup>C NMR** (100 MHz, CDCl<sub>3</sub>): δ 38.58 (C-4a), 115.18, 116.54, 116.77, 120.31, 121.99, 122.41, 122.49, 125.18, 125.59, 128.88, 129.72, 130.07, 132.56, 136.29, 139.07, 139.30, 140.26, 142.82, 144.05, 160.88 (C-2), 189.56 (C-3').

**HRMS:** *m/z* Calculated for C<sub>27</sub>H<sub>18</sub>ClFN<sub>4</sub>O<sub>2</sub> [M]<sup>+</sup> 484.1434 found 468.1421

**(*E*)-3-(3-(4-bromophenyl)-3-oxoprop-1-en-1-yl)-1-((1-(4-fluorophenyl)-1*H*-1,2,3-triazol-4-yl)methyl)quinolin-2(1*H*)-one (45)**

**Yield:** 80%, yellow solid.

**Melting Point:** 238-240 °C.

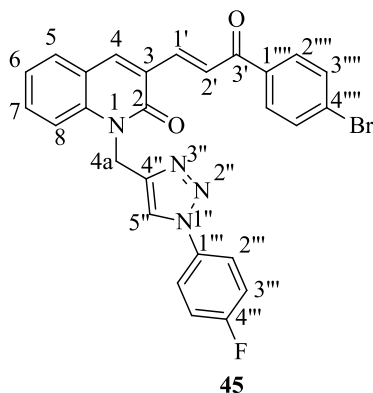

**IR** (KBr) (cm<sup>-1</sup>): ν 2995 (sp<sup>3</sup> C-H), 1700 (C=O), 1590 (C=C), 1098 (C-F), 820 (*p*-substitution) 522 (C-Br).

**<sup>1</sup>H NMR** (400 MHz, CDCl<sub>3</sub>): δ 5.66 (2H, s, C-4aH), 6.84 (1H, d, *J* = 12.97, Ar-H), 7.08-7.13 (3H, m, Ar-H), 7.21-7.25 (1H, m, Ar-H), 7.49 (1H, d, *J* = 8.39 Hz, Ar-H), 7.54-7.62 (3H, m, Ar-H), 7.75 (1H, d, *J* = 15.26 Hz, C-2'H), 7.79-7.81 (1H, m, Ar-H), 7.90-7.97 (4H, m, Ar-H), 8.02 (1H, s, C-4H), 8.11 (1H, s, C-5''H), 8.38 (1H, d, *J* = 16.02 Hz, C-1').

**<sup>13</sup>C NMR** (100 MHz, CDCl<sub>3</sub>): δ 38.58 (C-4a), 115.18, 116.54, 116.77, 120.31, 121.99, 122.41, 122.49, 123.09, 125.18, 125.59, 128.88, 129.72, 130.07, 132.56, 136.29, 139.07, 139.50, 140.26, 142.82 51, 144.05, 160.88 (C-2), 163.21, 189.56 (C-3').

**HRMS:** *m/z* Calculated for C<sub>27</sub>H<sub>18</sub>BrFN<sub>4</sub>O<sub>2</sub> [M]<sup>+</sup> 528.0645 found 528.0631.

**(E)-1-((1-(4-fluorophenyl)-1H-1,2,3-triazol-4-yl)methyl)-3-(3-oxo-3-(p-tolyl)prop-1-en-1-yl)quinolin-2(1H)-one (46)**

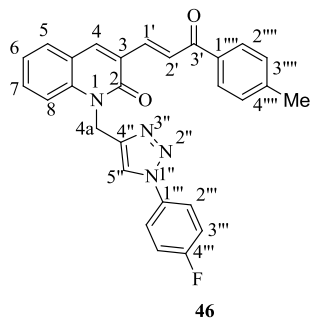

**Melting Point:** 132-134 °C.

**IR** (KBr) (cm<sup>-1</sup>): ν 2985 (sp<sup>3</sup> C-H), 1670 (C=O), 1620 (C=C), 1020 (C-O-C), 820 (*p*-substitution).

**<sup>1</sup>H NMR** (400 MHz, CDCl<sub>3</sub>): δ 2.41 (3H, s, -CH<sub>3</sub>), 5.70 (2H, s, C-4aH), 7.12-7.16 (3H, m, Ar-H), 7.24-7.28 (3H, m, Ar-H), 7.58-7.67 (4H, m, Ar-H), 7.71 (1H, d, *J* = 15.57 Hz, C-2'H), 7.95-7.99 (3H, m, Ar-H), 8.09 (1H, s, C-5''H), 8.44 (1H, d, *J* = 15.57 Hz, C-1').

**<sup>13</sup>C NMR** (100 MHz, CDCl<sub>3</sub>): δ 21.67 (-CH<sub>3</sub>), 38.52 (C-4a), 115.09, 116.50, 116.73, 120.34, 121.96, 122.38, 122.47, 122.98, 125.77, 125.88, 128.80, 129.26, 129.62, 132.30, 133.04, 138.97, 139.30, 142.17, 143.75, 144.13, 160.91 (C-2), 190.31 (C-3').

**HRMS:** *m/z* Calculated for C<sub>28</sub>H<sub>21</sub>FN<sub>4</sub>O<sub>2</sub> [M]<sup>+</sup> 464.1634 found 464.1613.

**(E)-1-((1-(4-fluorophenyl)-1H-1,2,3-triazol-4-yl)methyl)-3-(3-(2-methoxyphenyl)-3-oxoprop-1-en-1-yl)quinolin-2(1H)-one (47)**

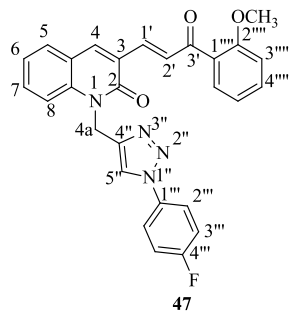

**Yield:** 55%, light brown solid.

**Melting Point:** 132-134 °C.

**IR** (KBr) (cm<sup>-1</sup>): ν 2995 (sp<sup>3</sup> C-H), 1680 (C=O), 1610 (C=C), 1010 (C-O-C), 822 (*p*-substitution).

**<sup>1</sup>H NMR** (400 MHz, CDCl<sub>3</sub>): δ 3.88 (3H, s, -OCH<sub>3</sub>), 5.65 (2H, s, C-4aH), 6.98-7.02 (3H, m, Ar-H), 7.13-7.15 (3H, m, Ar-H), 7.27-7.29 (2H, m, Ar-H), 7.45-7.47 (1H, m, Ar-H), 7.60-7.64 (3H, m, Ar-H), 7.71 (1H, d, *J* = 16.03 Hz, C-2'H), 7.97 (3H, m, Ar-H), 8.05 (1H, s, C-5''H).

<sup>13</sup>C NMR (100 MHz, CDCl<sub>3</sub>): δ 38.52 (C-4a), 55.78 (-OCH<sub>3</sub>), 111.63, 115.05, 116.49, 116.72, 120.31, 120.61, 122.34, 122.43, 122.90, 126.31, 129.41, 129.55, 130.24, 132.10, 132.86, 137.98, 139.07, 140.33, 158.12, 160.86 (C-2), 193.36 (C-3').

HRMS: *m/z* Calculated for C<sub>28</sub>H<sub>21</sub>FN<sub>4</sub>O<sub>3</sub> [M]<sup>+</sup> 480.1634 found 480.1613.

**(E)-1-((1-(4-fluorophenyl)-1H-1,2,3-triazol-4-yl)methyl)-3-(3-(3-methoxyphenyl)-3-oxoprop-1-en-1-yl)quinolin-2(1H)-one (48)**

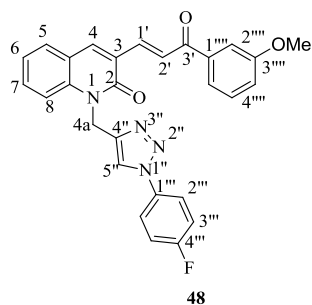

**Yield:** 88%, yellow solid.

**Melting Point:** 220-222 °C.

**IR** (KBr) (cm<sup>-1</sup>): ν 2950 (sp<sup>3</sup> C-H), 1692 (C=O), 1590 (C=C), 1099 (C-O-C), 822 (*p*-substitution).

**<sup>1</sup>H NMR** (400 MHz, CDCl<sub>3</sub>): δ 3.86 (3H, s, -OCH<sub>3</sub>), 5.70 (2H, s, C-4aH), 6.95 (2H, d, *J* = 9.16 Hz, Ar-H), 7.14-7.17 (3H, m, Ar-H), 7.25-7.26 (1H, m, Ar-H), 7.61-7.65 (3H, m, Ar-H), 7.77 (1H, d, *J* = 15.11 Hz, C-2'H), 7.95-7.98 (2H, m, Ar-H), 8.08-8.10 (3H, m, Ar-H), 8.45 (1H, d, *J* = 15.11 Hz, C-1'H).

**<sup>13</sup>C NMR** (100 MHz, CDCl<sub>3</sub>): δ 38.58 (C-4a), 55.46 (-OCH<sub>3</sub>), 113.75, 115.09, 116.51, 116.74, 120.38, 121.99, 122.39, 122.47, 122.98, 125.71, 125.93, 129.60, 131.00, 132.25, 138.95, 142.16, 160.95, 163.45 (C-2), 189.10 (C-3').

HRMS: *m/z* Calculated for C<sub>28</sub>H<sub>21</sub>FN<sub>4</sub>O<sub>3</sub> [M]<sup>+</sup> 480.1623 found 480.1633.

**(E)-1-((1-(4-fluorophenyl)-1H-1,2,3-triazol-4-yl)methyl)-3-(3-(4-methoxyphenyl)-3-oxoprop-1-en-1-yl)quinolin-2(1H) (49)**

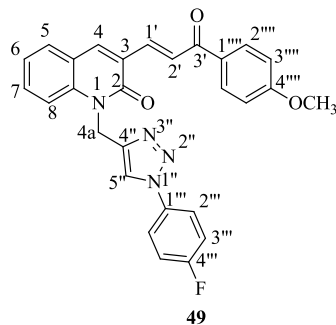

**Yield:** 78%, yellow solid.

**Melting Point:** 222-224 °C.

**IR** (KBr) (cm<sup>-1</sup>): ν 2955 (sp<sup>3</sup> C-H), 1695 (C=O), 1595 (C=C), 1098 (C-O-C), 822 (*p*-substitution).

**<sup>1</sup>H NMR** (400 MHz, CDCl<sub>3</sub>): δ 3.86 (3H, s, -OCH<sub>3</sub>), 5.70 (2H, s, C-4aH), 6.95 (2H, d, *J* = 9.16 Hz, Ar-H), 7.14-7.17 (3H, m, Ar-H), 7.25-7.26 (1H, m, Ar-H), 7.61-7.65 (3H, m, Ar-H), 7.77 (1H, d, *J* = 15.11 Hz, C-2'H), 7.95-7.98 (2H, m, Ar-H), 8.08-8.10 (3H, m, Ar-H), 8.45 (1H, d, *J* = 15.11 Hz, C-1'H).

**<sup>13</sup>C NMR** (100 MHz, CDCl<sub>3</sub>): δ 38.58 (C-4a), 55.46 (-OCH<sub>3</sub>), 113.75, 115.09, 116.51, 116.74, 120.38, 121.99, 122.39, 122.47, 122.98, 125.71, 125.93, 129.60, 131.00, 132.25, 138.95, 142.16, 160.95, 163.45 (C-2), 189.10 (C-3').

**HRMS:** *m/z* Calculated for C<sub>28</sub>H<sub>21</sub>FN<sub>4</sub>O<sub>3</sub> [M]<sup>+</sup> 480.1623 found 480.1633.

**(E)-1-((1-(4-chlorophenyl)-1H-1,2,3-triazol-4-yl)methyl)-3-(3-(2-fluorophenyl)-3-oxoprop-1-en-1-yl)quinolin-2(1H)-one (50)**

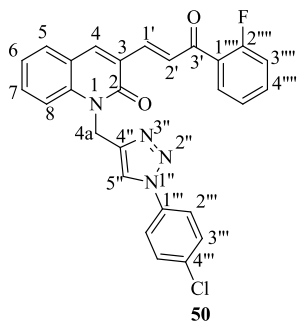

**Yield:** 66%, yellow solid.

**Melting Point:** 242-244 °C.

**IR** (KBr) (cm<sup>-1</sup>): ν 2986 (sp<sup>3</sup> C-H), 1690 (C=O), 1590 (C=C), 1090 (C-F), 820 (*p*-substitution).

**<sup>1</sup>H NMR** (400 MHz, CDCl<sub>3</sub>): δ 5.67 (2H, s, C-4aH), 7.18-7.20 (1H, m, Ar-H), 7.25-7.27 (2H, m, Ar-H), 7.41-7.43 (2H, m, Ar-H), 7.53-7.55 (1H, m, Ar-H), 7.61-7.64 (4H, m, Ar-H), 7.80-7.82 (2H, m, Ar-H), 7.97 (1H, d, *J* = 8.7 Hz, Ar-H), 8.02 (1H, s, C-5''H), 8.10-8.12 (2H, m, Ar-H).

<sup>13</sup>C NMR (100 MHz, CDCl<sub>3</sub>): δ 38.54 (C-4a), 115.13, 117.13, 125.56, 123.03, 129.71, 129.82, 130.91, 132.44, 139.51, 141.52, 160.92 (C-2), 189.64 (C-3').

HRMS: *m/z* Calculated for C<sub>27</sub>H<sub>18</sub>FCIN<sub>4</sub>O<sub>2</sub> [M]<sup>+</sup> 484.1123 found 484.1123.

**(E)-1-((1-(4-chlorophenyl)-1H-1,2,3-triazol-4-yl)methyl)-3-(3-(3-fluorophenyl)-3-oxoprop-1-en-1-yl)quinolin-2(1H)-one (51)**

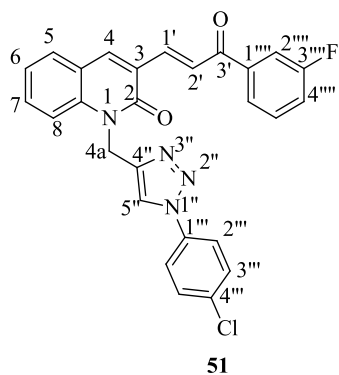

**Yield:** 90%, yellow solid.

**Melting Point:** 190-192 °C.

**IR** (KBr) (cm<sup>-1</sup>): ν 2955 (sp<sup>3</sup> C-H), 1675 (C=O), 1610 (C=C), 825 (*p*-substitution), 820 (C-Cl).

**<sup>1</sup>H NMR** (400 MHz, CDCl<sub>3</sub>): δ 5.70 (2H, s, C-4aH), 7.25-7.29 (2H, m, Ar-H), 7.42-7.49 (3H, m, Ar-H), 7.62-7.68 (4H, m, Ar-H), 7.74-7.76 (1H, m, Ar-H), 7.81 (1H, d, *J* = 15.26 Hz, C-1'H), 7.87 (2H, d, *J* = 7.63 Hz, Ar-H), 7.99-8.02 (2H, m, Ar-H), 8.11 (1H, s, C-5''H), 8.42 (1H, d, *J* = 15.26 Hz, C-1'H).

<sup>13</sup>C NMR (100 MHz, CDCl<sub>3</sub>): δ 38.95 (C-4a), 115.22, 120.47, 123.04, 125.15, 128.81, 129.65, 132.56, 139.08, 140.49, 142.87, 164.02 (C-2), 189.42 (C-3').

HRMS: *m/z* Calculated for C<sub>27</sub>H<sub>18</sub>FCIN<sub>4</sub>O<sub>2</sub> [M]<sup>+</sup> 484.1123 found 484.1125.

**(E)-1-((1-(4-chlorophenyl)-1H-1,2,3-triazol-4-yl)methyl)-3-(3-(4-fluorophenyl)-3-oxoprop-1-en-1-yl)quinolin-2(1H)-one (52)**

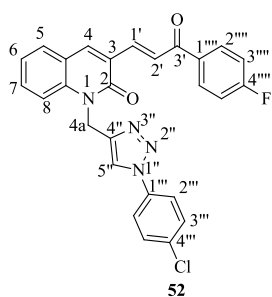

**Yield:** 75%, yellow solid.

**Melting Point:** 216-218 °C.

**IR** (KBr) (cm<sup>-1</sup>): ν 3015 (sp<sup>3</sup> C-H), 1685 (C=O), 1620 (C=C), 1099 (C-F), 810 (*p*-substitution).

**<sup>1</sup>H NMR** (400 MHz, CDCl<sub>3</sub>): δ 5.70 (2H, s, C-4aH), 7.13-7.17 (2H, m, Ar-H), 7.22-7.27

(3H, m, Ar-H), 7.37-7.39 (1H, m, Ar-H), 7.43-7.51 (3H, m, Ar-H), 7.61-7.67 (3H, m, Ar-H), 7.79 (1H, d,  $J = 15.26$  Hz, C-2'H), 7.81-7.83 (2H, m, Ar-H), 7.99 (1H, s, C-5''H), 8.10-8.01-8.02 (1H, m, Ar-H), 8.08-8.12 (3H, m, Ar-H), 8.45 (1H, d,  $J = 15.26$  Hz, C-1'H).

<sup>13</sup>C NMR (100 MHz, CDCl<sub>3</sub>):  $\delta$  38.54 (C-4a), 115.13, 117.13, 125.56, 123.03, 129.71, 129.82, 130.91, 132.44, 139.51, 141.52, 160.92 (C-2), 189.64 (C-3').

HRMS:  $m/z$  Calculated for C<sub>27</sub>H<sub>18</sub>FCIN<sub>4</sub>O<sub>2</sub> [M]<sup>+</sup> 484.1123 found 484.1123.

**(E)-1-((1-(4-chlorophenyl)-1H-1,2,3-triazol-4-yl)methyl)-3-(3-(4-chlorophenyl)-3-oxoprop-1-en-1-yl)quinolin-2(1H)-one (53)**

**Yield:** 95%, light green solid.

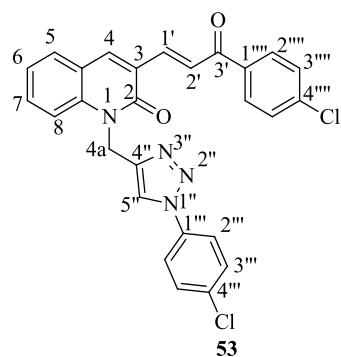

**Melting Point:** 180-182 °C.

**IR** (KBr) (cm<sup>-1</sup>):  $\nu$  3025 (sp<sup>3</sup> C-H), 1685 (C=O), 1599 (C=C), 822 (*p*-substitution).

<sup>1</sup>H NMR (400 MHz, CDCl<sub>3</sub>):  $\delta$  5.70 (2H, s, C-4aH), 7.24-7.27 (2H, m, Ar-H), 7.44-7.46 (4H, m, Ar-H), 7.63-7.65 (4H, m, Ar-H), 7.79 (1H, d,  $J = 12.97$  Hz, C-2'H), 8.02-8.08 (4H, m, Ar-H), 8.42 (1H, d,  $J = 11.44$  Hz, C-1').

<sup>13</sup>C NMR (100 MHz, CDCl<sub>3</sub>):  $\delta$  38.58 (C-4a), 115.18, 116.54, 116.77, 120.31, 121.99, 122.41, 122.49, 123.09, 125.18, 125.59, 128.88, 129.72, 130.07, 132.56, 136.29, 139.07, 139.50, 140.26, 142.82, 144.05, 160.88 (C-2), 163.21, 189.56 (C-3').

HRMS:  $m/z$  Calculated for C<sub>27</sub>H<sub>18</sub>Cl<sub>2</sub>N<sub>4</sub>O<sub>2</sub> [M]<sup>+</sup> 500.0856 found 500.0832.

**(E)-3-(3-(4-bromophenyl)-3-oxoprop-1-en-1-yl)-1-((1-(4-chlorophenyl)-1H-1,2,3-triazol-4-yl)methyl)quinolin-2(1H)-one (54)**

**Yield:** 85%, light yellow solid.

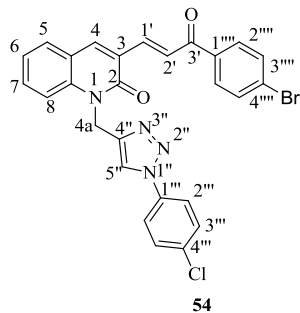

**Melting Point:** 190-192 °C.

**IR** (KBr) (cm<sup>-1</sup>): ν 2099 (sp<sup>3</sup> C-H), 1680 (C=O), 1609 (C=C), 822 (*p*-substitution).

**<sup>1</sup>H NMR** (400 MHz, CDCl<sub>3</sub>): δ 5.66 (2H, s, C-4aH), 7.24-7.29 (2H, m, Ar-H), 7.44-7.51 (2H, m, Ar-H), 7.64-7.81 (6H, m, Ar-H), 7.95-8.13 (4H, m, Ar-H), 8.39-8.44 (1H, m, Ar-H),

**<sup>13</sup>C NMR** (100 MHz, CDCl<sub>3</sub>): δ 38.58 (C-4a), 115.18, 116.54, 116.77, 120.31, 121.99, 122.41, 122.49, 123.09, 125.18, 125.59, 128.88, 129.72, 130.07, 132.56, 136.29, 139.07, 139.50, 140.26, 142.82, 144.05, 160.88 (C-2), 163.21, 189.56 (C-3').

**HRMS:** *m/z* Calculated for C<sub>27</sub>H<sub>18</sub>BrClN<sub>4</sub>O<sub>2</sub> [M]<sup>+</sup> 544.0302 found 544.0332.

**(E)-1-((1-(4-chlorophenyl)-1H-1,2,3-triazol-4-yl)methyl)-3-(3-oxo-3-(*p*-tolyl)prop-1-en-1-yl)quinolin-2(1H)-one (55)**

**Yield:** 65%, light green solid.

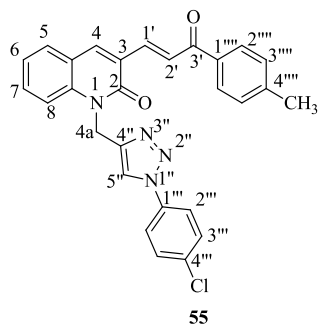

**Melting Point:** 217-219 °C.

**IR** (KBr) (cm<sup>-1</sup>): ν 2956 (sp<sup>3</sup> C-H), 1695 (C=O), 1615 (C=C), 812 (*p*-substitution).

**<sup>1</sup>H NMR** (400 MHz, CDCl<sub>3</sub>): δ 2.40 (3H, s, -CH<sub>3</sub>), 5.69 (2H, s, C-4aH), 7.25-7.27 (3H, m, Ar-H), 7.40-7.42 (3H, m, Ar-H), 7.57-7.61 (3H, m, Ar-H), 7.77 (1H, d, *J* = 15.11 Hz, C-2'H), 7.96-7.98 (3H, m, Ar-H), 8.13 (1H, s, C-5''H), 8.42 (1H, d, *J* = 15.11 Hz, C-1'H).

**<sup>13</sup>C NMR** (100 MHz, CDCl<sub>3</sub>): δ 21.67 (-CH<sub>3</sub>), 38.56 (C-4a), 121.59, 123.00, 125.76, 128.78, 129.95, 129.63, 129.82, 132.31, 134.54, 139.27, 142.18, 160.51 (C-2),



189.53 (C-3').

HRMS:  $m/z$  Calculated for C<sub>28</sub>H<sub>21</sub>ClN<sub>4</sub>O<sub>2</sub> [M]<sup>+</sup> 480.1446 found 480.1425.

**(E)-1-((1-(4-chlorophenyl)-1H-1,2,3-triazol-4-yl)methyl)-3-(3-(2-methoxyphenyl)-3-oxoprop-1-en-1-yl)quinolin-2(1H)-one (56)**

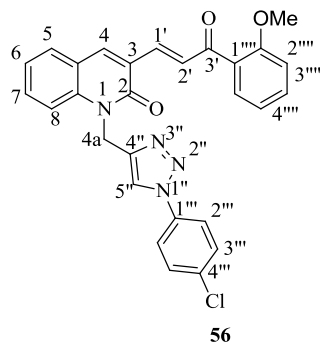

**Yield:** 75%, yellow solid.

**Melting Point:** 230-232 °C.

**IR** (KBr) (cm<sup>-1</sup>):  $\nu$  2950 (sp<sup>3</sup> C-H), 1685 (C=O), 1610 (C=C), 815 (*p*-substitution).

**<sup>1</sup>H NMR** (400 MHz, CDCl<sub>3</sub>):  $\delta$  3.89 (3H, s, -OCH<sub>3</sub>), 5.65 (2H, s, C-4aH), 6.96-7.02 (2H, m, Ar-H), 7.22-7.25 (1H, m, Ar-H), 7.40-7.46 (4H, m, Ar-H), 7.58-7.64 (5H, m, Ar-H), 7.69-7.73 (2H, m, Ar-H), 7.93-7.97 (2H, m, Ar-H), 8.08 (1H, s, C-5''H).

**<sup>13</sup>C NMR** (100 MHz, CDCl<sub>3</sub>):  $\delta$  38.48 (C-4a), 55.78 (-OCH<sub>3</sub>), 111.62, 115.02, 120.62, 121.53, 122.93, 126.31, 129.56, 129.81, 130.25, 132.11, 132.87, 134.53, 139.05, 140.34, 157.67, 160.87 (C-2), 192.80 (C-3').

HRMS:  $m/z$  Calculated for C<sub>28</sub>H<sub>21</sub>ClN<sub>4</sub>O<sub>3</sub> [M]<sup>+</sup> 496.1446 found 496.1425.

**(E)-1-((1-(4-chlorophenyl)-1H-1,2,3-triazol-4-yl)methyl)-3-(3-(3-methoxyphenyl)-3-oxoprop-1-en-1-yl)quinolin-2(1H)-one (57)**

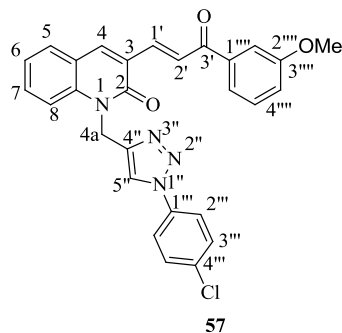

**Yield:** 65%, yellow solid.

**Melting Point:** 215-217 °C.

**IR** (KBr) (cm<sup>-1</sup>):  $\nu$  2852 (sp<sup>3</sup> C-H), 1690 (C=O), 1630 (C=C), 822 (*p*-substitution).

**<sup>1</sup>H NMR** (400 MHz, CDCl<sub>3</sub>):  $\delta$  3.85 (3H, s, -OCH<sub>3</sub>), 5.68 (2H, s, C-4aH), 7.09-7.11 (1H, m, Ar-H), 7.24-7.26 (1H, m, Ar-H), 7.39-7.45 (3H, m, Ar-H), 7.57-7.67 (5H, m, Ar-H), 7.78 (1H, d, *J* = 15.57 Hz, C-2'), 7.94-7.98 (1H, m, Ar-H), 8.13 (1H, s, C-5''H), 8.38 (1H, d, *J* = 15.11 Hz, C-1').

<sup>13</sup>C NMR (100 MHz, CDCl<sub>3</sub>): δ 38.53 (C-4a), 55.44 (-OCH<sub>3</sub>), 112.79, 115.10, 119.41, 120.31, 121.36, 121.57, 123.02, 125.72, 129.51, 129.83, 132.38, 139.01, 139.34, 139.71, 142.21, 159.79, 160.87 (C-2), 191.31 (C-3').

HRMS: *m/z* Calculated for C<sub>28</sub>H<sub>21</sub>ClN<sub>4</sub>O<sub>3</sub> [M]<sup>+</sup> 496.1302 found 496.1300.

**(E)-1-((1-(4-chlorophenyl)-1H-1,2,3-triazol-4-yl)methyl)-3-(3-(4-methoxyphenyl)-3-oxoprop-1-en-1-yl)quinolin-2(1H)-one (58)**

Yield: 85%, yellow solid.

Melting Point: 210-212 °C.

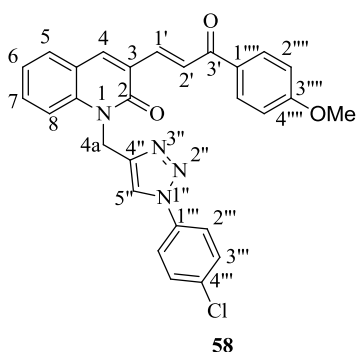

IR (KBr) (cm<sup>-1</sup>): ν 2950 (sp<sup>3</sup> C-H), 1685 (C=O), 1599 (C=C), 820(*p*-substitution).

<sup>1</sup>H NMR (400 MHz, CDCl<sub>3</sub>): δ 3.85 (3H, s, -OCH<sub>3</sub>), 5.68 (2H, s, C-4aH), 7.09-7.11 (1H, m, Ar-H), 7.24-7.26 (1H, m, Ar-H), 7.39-7.45 (3H, m, Ar-H), 7.57-7.67 (5H, m, Ar-H), 7.78 (1H, d, *J* = 15.57 Hz, C-2'), 7.94-7.98 (1H, m, Ar-H), 8.13 (1H, s, C-5''H), 8.38 (1H, d, *J* = 15.11 Hz, C-1').

<sup>13</sup>C NMR (100 MHz, CDCl<sub>3</sub>): δ 38.07 (C-4a), 55.48 (-OCH<sub>3</sub>), 113.78, 115.09, 115.51, 119.43, 121.56, 121.73, 121.89, 123.49, 124.93, 129.62, 129.84, 134.36, 134.68, 138.97, 142.26, 143.82, 161.67 (C-2), 189.66 (C-3').

HRMS: *m/z* Calculated for C<sub>28</sub>H<sub>21</sub>ClN<sub>4</sub>O<sub>3</sub> [M]<sup>+</sup> 496.1455 found 496.1425.

**(E)-3-(3-(2-fluorophenyl)-3-oxoprop-1-en-1-yl)-1-((1-phenyl-1H-1,2,3-triazol-4-yl)methyl)quinolin-2(1H)-one (59)**

Yield: 70%, yellow solid.

Melting Point: 172-174 °C.

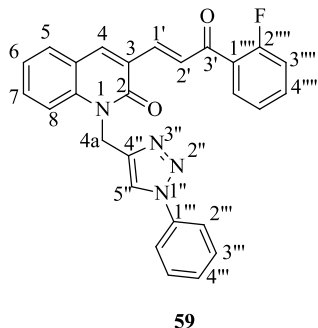

IR (KBr) (cm<sup>-1</sup>): ν 2995 (sp<sup>3</sup> C-H), 1695 (C=O), 1590 (C=C), 1090 (C-F).

<sup>1</sup>H NMR (400 MHz, CDCl<sub>3</sub>): δ 5.69 (2H, s, C-4aH), 7.13-7.17 (2H, m, Ar-H), 7.22-

7.27 (3H, m, Ar-H), 7.37-7.39 (1H, m, Ar-H), 7.43-7.51 (3H, m, Ar-H), 7.61-7.67 (3H, m, Ar-H), 7.79-7.83 (2H, m, Ar-H), 7.99 (1H, s, C-5''H), 8.01-8.02 (1H, m, Ar-H), 8.11-8.12 (2H, m, Ar-H).

<sup>13</sup>C NMR (100 MHz, CDCl<sub>3</sub>): δ 38.54 (C-4a), 115.13, 117.13, 125.56, 123.03, 129.71, 129.82, 130.91, 132.44, 139.51, 141.52, 160.92 (C-2), 189.64 (C-3').

HRMS: *m/z* Calculated for C<sub>27</sub>H<sub>19</sub>FN<sub>4</sub>O<sub>2</sub> [M]<sup>+</sup> 450.1587 found 450.1568.

**(E)-3-(3-(3-fluorophenyl)-3-oxoprop-1-en-1-yl)-1-((1-phenyl-1H-1,2,3-triazol-4-yl)methyl)quinolin-2(1H)-one (60)**

**Yield:** 90%, yellow solid.

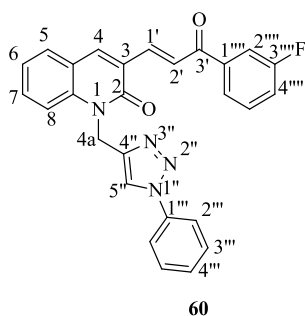

**Melting Point:** 180-182 °C.

**IR** (KBr) (cm<sup>-1</sup>): ν 2936 (sp<sup>3</sup> C-H), 1660 (C=O), 1599 (C=C) 1028 (C-F).

<sup>1</sup>H NMR (400 MHz, CDCl<sub>3</sub>): δ 5.70 (2H, s, C-4aH), 7.25-7.27 (3H, m, Ar-H), 7.38-7.44 (4H, m, Ar-H), 7.63-7.67 (3H, m, Ar-H), 7.73-7.78 (3H, m, Ar-H), 7.85-7.87 (2H, m, Ar-H), 8.00 (1H, s, C-5''H), 8.40 (1H, d, *J* = 15.11 Hz, C-1'H).

<sup>13</sup>C NMR (100 MHz, CDCl<sub>3</sub>): δ 37.99 (C-4a), 115.22, 120.47, 123.04, 125.15, 128.81, 129.65, 132.56, 139.08, 140.49, 142.87, 161.01, 164.02 (C-2), 189.42 (C-3').

HRMS: *m/z* Calculated for C<sub>27</sub>H<sub>19</sub>FN<sub>4</sub>O<sub>2</sub> [M]<sup>+</sup> 450.1587 found 450.1500.

**(E)-3-(3-(4-fluorophenyl)-3-oxoprop-1-en-1-yl)-1-((1-phenyl-1H-1,2,3-triazol-4-yl)methyl)quinolin-2(1H)-one (61)**

**Yield:** 80%, light yellow solid.

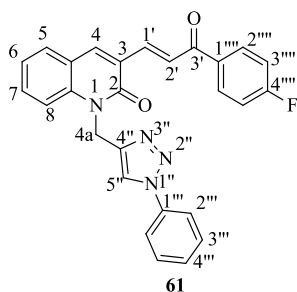

**Melting Point:** 202-204 °C.

**IR** (KBr) (cm<sup>-1</sup>): ν 2956 (sp<sup>3</sup> C-H), 2855, 1665 (C=O), 1599 (C=C), 1033 (C-F), 820 (*p*-substitution).

<sup>1</sup>H NMR (400 MHz, CDCl<sub>3</sub>): δ 5.71 (2H, s, C-4aH), 7.16-7.20 (2H, m, Ar-H), 7.25-7.27 (1H, m, Ar-H), 7.39-7.40 (1H, m, Ar-H), 7.45-7.47 (2H, m, Ar-H), 7.66-7.70 (4H, m, Ar-H), 7.78 (1H, d, *J* = 15.57 Hz, C-2'H), 7.99-8.00 (1H, m, Ar-H), 8.11-8.14 (3H, m, Ar-H), 8.46 (1H, d, *J* = 15.11 Hz, C-1'H).

<sup>13</sup>C NMR (100 MHz, CDCl<sub>3</sub>): δ 38.56 (C-4a), 115.18, 116.54, 116.77, 120.31, 121.99, 122.41, 122.49, 123.09, 125.18, 125.59, 128.88, 129.72, 130.07, 132.56, 136.29, 139.07, 139.50, 140.26, 142.82 51, 144.05, 160.88 (C-2), 189.19 (C-3').

HRMS: *m/z* Calculated for C<sub>27</sub>H<sub>19</sub>BrN<sub>4</sub>O<sub>2</sub> [M]<sup>+</sup> 510.0756 found 510.0717.

**(*E*)-3-(3-(4-chlorophenyl)-3-oxoprop-1-en-1-yl)-1-((1-phenyl-1*H*-1,2,3-triazol-4-yl)methyl)quinolin-2(1*H*)-one (62)**

**Yield:** 75%, light yellow solid.

**Melting Point:** 216-218 °C.

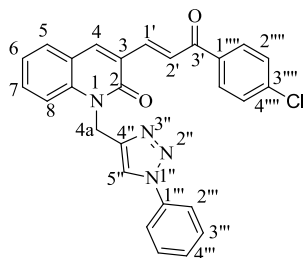

62

**IR** (KBr) (cm<sup>-1</sup>): ν 2925 (sp<sup>3</sup> C-H), 1710 (C=O), 1600 (C=C), 822 (*p*-substitution).

<sup>1</sup>H NMR (400 MHz, CDCl<sub>3</sub>): δ 5.72 (2H, s, C-4aH), 7.28-7.30 (1H, m, Ar-H), 7.37-7.40 (2H, m, Ar-H), 7.42-7.69 (2H, m, Ar-H), 7.62-7.68 (4H, m, Ar-H), 7.80 (1H, d, *J* = 13.73 Hz, C-2'H), 7.95-7.97 (3H, m, Ar-H), 8.02 (1H, s, C-4H), 8.11 (1H, s, C-5''H), 8.44 (1H, d, *J* = 13.73 Hz, C-1').

<sup>13</sup>C NMR (100 MHz, CDCl<sub>3</sub>): δ 38.58 (C-4a), 115.18, 116.54, 116.77, 120.31, 121.99, 122.41, 122.49, 123.09, 125.18, 125.59, 128.88, 129.72, 130.07, 132.56, 136.29, 139.07, 139.50, 140.26, 142.82 51, 144.05, 162.32 (C-2), 189.56 (C-3').

HRMS: *m/z* Calculated for C<sub>27</sub>H<sub>19</sub>ClN<sub>4</sub>O<sub>2</sub> [M]<sup>+</sup> 466.1197 found 466.1127.

**(E)-3-(3-(4-bromophenyl)-3-oxoprop-1-en-1-yl)-1-((1-phenyl-1H-1,2,3-triazol-4-yl)methyl)quinolin-2(1H)-one (63)**

**Yield:** 80%, light yellow solid.

**Melting Point:** 212-214 °C.

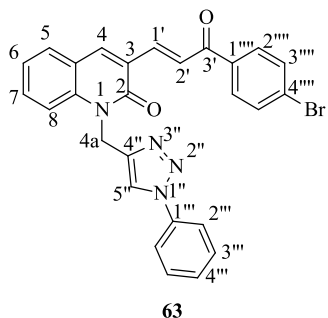

**IR** (KBr) (cm<sup>-1</sup>): ν 3025 (sp<sup>3</sup> C-H), 1715 (C=O), 1619 (C=C), 832 (*p*-substitution).

**<sup>1</sup>H NMR** (400 MHz, CDCl<sub>3</sub>): δ 5.72 (2H, s, C-4aH), 7.28-7.30 (1H, m, Ar-H), 7.37-7.40 (2H, m, Ar-H), 7.42-7.69 (2H, m, Ar-H), 7.62-7.68 (4H, m, Ar-H), 7.80 (1H, d, *J* = 13.73 Hz, C-2'H), 7.95-7.97 (3H, m, Ar-H), 8.02 (1H, s, C-4H), 8.11 (1H, s, C-5''H), 8.44 (1H, d, *J* = 13.73 Hz, C-1').

**<sup>13</sup>C NMR** (100 MHz, CDCl<sub>3</sub>): δ 38.58 (C-4a), 115.18, 116.54, 116.77, 120.31, 121.99, 122.41, 122.49, 123.09, 125.18, 125.59, 128.88, 129.72, 130.07, 132.56, 136.29, 139.07, 139.50, 140.26, 142.82, 144.05, 162.32 (C-2), 189.56 (C-3').

**HRMS:** *m/z* Calculated for C<sub>27</sub>H<sub>19</sub>FN<sub>4</sub>O<sub>2</sub> [M]<sup>+</sup> 450.1587 found 450.1527.

**(E)-3-(3-oxo-3-(*p*-tolyl)prop-1-en-1-yl)-1-((1-phenyl-1H-1,2,3-triazol-4-yl)methyl)quinolin-2(1H)-one (64)**

**Yield:** 90%, yellow solid.

**Melting Point:** 216-218 °C.

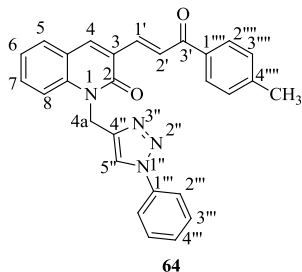

**IR** (KBr) (cm<sup>-1</sup>): ν 2936 (sp<sup>3</sup> C-H), 1685 (C=O), 1590 (C=C), 818 (*p*-substitution).

**<sup>1</sup>H NMR** (400 MHz, CDCl<sub>3</sub>): δ 2.40 (3H, s, -CH<sub>3</sub>), 5.72 (2H, s, C-4aH), 7.25-7.29 (3H, m, Ar-H), 7.30-7.47 (4H, m, Ar-H), 7.61-7.67 (4H, m, Ar-H), 7.69 (1H, d, *J* = 15.11 Hz, C-2'H), 7.99-8.01 (3H, m, Ar-H), 8.14 (1H, s, C-5''H), 8.46 (1H, d, *J* = 15.11 Hz, C-1'H).

**<sup>13</sup>C NMR** (100 MHz, CDCl<sub>3</sub>): δ 21.67 (-CH<sub>3</sub>) 38.57 (C-4a), 121.59, 123.00, 125.76, 128.78, 129.95, 129.63, 129.82, 132.31, 134.54, 139.27, 142.18, 169.22 (C-2),

189.84 (C-3').

**HRMS:** *m/z* Calculated for C<sub>28</sub>H<sub>22</sub>N<sub>4</sub>O<sub>2</sub> [M]<sup>+</sup> 446.1745 found 446.1745.

**(E)-3-(3-(2-methoxyphenyl)-3-oxoprop-1-en-1-yl)-1-((1-phenyl-1H-1,2,3-triazol-4-yl)methyl)quinolin-2(1H)-one (65)**

**Yield:** 90%, light yellow solid.

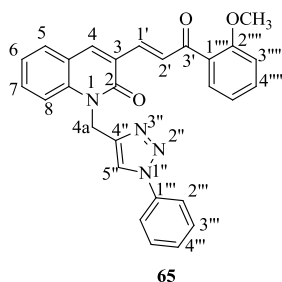

**Melting Point:** 210-212 °C.

**IR** (KBr) (cm<sup>-1</sup>): ν 2990 (sp<sup>3</sup> C-H), 1680 (C=O), 1589 (C=C), 1099 (C-O-C).

**<sup>1</sup>H NMR** (400 MHz, CDCl<sub>3</sub>): δ 3.89 (3H, s, -OCH<sub>3</sub>), 5.67 (2H, s, C-4aH), 6.98-7.24 (2H, m, Ar-H), 7.25-7.27 (2H, m, Ar-H), 7.42-7.46 (4H, m, Ar-H), 7.58-7.61 (3H, m, Ar-H), 7.64-7.66 (2H, m, Ar-H), 7.72 (1H, d, *J* = 15.57, C-2'H), 7.94-7.98 (3H, m, Ar-H), 8.08 (1H, s, C-5''H).

**<sup>13</sup>C NMR** (100 MHz, CDCl<sub>3</sub>): δ 38.57 (C-4a), 55.78 (-OCH<sub>3</sub>), 111.63, 115.11, 120.40, 120.62, 122.88, 126.34, 128.77, 129.53, 129.63, 130.25, 132.10, 132.84, 138.05, 139.11, 140.36, 158.14, 161.10, 193.06 (C-3').

**HRMS:** *m/z* Calculated for C<sub>28</sub>H<sub>22</sub>N<sub>4</sub>O<sub>3</sub> [M]<sup>+</sup> 462.1732 found 462.1746.

**(E)-3-(3-(3-methoxyphenyl)-3-oxoprop-1-en-1-yl)-1-((1-phenyl-1H-1,2,3-triazol-4-yl)methyl)quinolin-2(1H)-one (66)**

**Yield:** 92%, yellow solid.

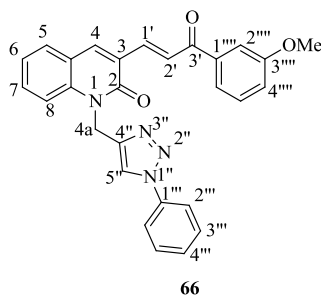

**Melting Point:** 224-226 °C.

**IR** (KBr) (cm<sup>-1</sup>): ν 3025 (sp<sup>3</sup> C-H), 1680 (C=O), 1592 (C=C), 1100 (C-O-C).

**<sup>1</sup>H NMR** (400 MHz, CDCl<sub>3</sub>): δ 3.87 (3H, s, -OCH<sub>3</sub>), 5.71 (2H, s, C-4aH), 7.10-7.13 (1H, m, Ar-H), 7.24-7.28 (1H, m, Ar-H), 7.38-7.47 (5H, m, Ar-H), 7.59-7.70 (5H, m, Ar-H), 7.81 (1H, d, *J* = 15.26 Hz, C-2'H), 7.98-8.01 (2H, m, Ar-H), 8.11 (1H, s, C-

5''H), 8.41 (1H, d,  $J = 15.26$  Hz, C-1'H).

<sup>13</sup>C NMR (100 MHz, CDCl<sub>3</sub>):  $\delta$  38.53 (C-4a), 55.44 (-OCH<sub>3</sub>), 112.79, 115.10, 119.41, 120.31, 121.36, 121.57, 123.02, 125.72, 125.80, 129.83, 132.38, 139.01, 139.34, 139.71, 142.21, 159.79, 160.87 (C-2), 190.77 (C-3').

HRMS:  $m/z$  Calculated for C<sub>28</sub>H<sub>22</sub>N<sub>4</sub>O<sub>3</sub> [M]<sup>+</sup> 462.1732 found 462.1743.

**(E)-3-(3-(4-methoxyphenyl)-3-oxoprop-1-en-1-yl)-1-((1-phenyl-1H-1,2,3-triazol-4-yl)methyl)quinolin-2(1H)-one (67)**

**Yield:** 93%, light yellow solid.

**Melting Point:** 215-217 °C.

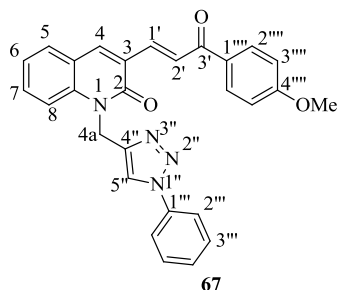

**IR** (KBr) (cm<sup>-1</sup>):  $\nu$  2935 (sp<sup>3</sup> C-H), 1667 (C=O), 1605 (C=C), 1090 (C-O-C), 820 (*p*-substitution).

<sup>1</sup>H NMR (400 MHz, CDCl<sub>3</sub>):  $\delta$  3.87 (3H, s, -OCH<sub>3</sub>), 5.71 (2H, s, C-4aH), 6.95 (2H, d,  $J = 7.25$  Hz, Ar-H), 7.38-7.45 (4H, m, Ar-H), 7.63-7.66 (3H, m, Ar-H), 7.78 (1H, d,  $J = 15.26$  Hz, C-1'H), 7.97-7.99 (2H, m, Ar-H), 8.11-8.11 (2H, m, Ar-H), 8.47 (1H, d,  $J = 15.26$  Hz, C-1'H).

<sup>13</sup>C NMR (100 MHz, CDCl<sub>3</sub>):  $\delta$  38.07 (C-4a), 55.48 (-OCH<sub>3</sub>), 113.78, 115.09, 115.51, 119.43, 121.56, 121.73, 121.89, 123.49, 124.93, 129.62, 129.84, 129.88, 131.04, 131.88, 132.29, 134.36, 134.68, 138.97, 141.27, 142.26, 143.82, 161.31 (C-2), 189.66 (C-3').

HRMS:  $m/z$  Calculated for C<sub>28</sub>H<sub>22</sub>N<sub>4</sub>O<sub>3</sub> [M]<sup>+</sup> 462.1732 found 462.1721.
